# Supplementary material
Source: Research Square preprint supplement (doi:10.21203/rs.3.rs-9677735/v1)
Supplement: Supplementary file 1 [file 749fc3281d2d56a306888be3.pdf]

## Supporting Information

# A Crystalline Dioxaborirane through Borylene Activation of Dioxygen

Guanrong Chen,<sup>1,2</sup> Zhaoyang Liu,<sup>1</sup> Jiancheng Li,<sup>2,\*</sup> Liu Leo Liu,<sup>2,3,\*</sup> Hanqiang Wang<sup>1,\*</sup>

<sup>1</sup>Department of Chemistry, School of Sciences, Great Bay University, Dongguan 523000, China

<sup>2</sup>Department of Chemistry, Southern University of Science and Technology, Shenzhen 518055, China

<sup>3</sup>State Key Laboratory of Elemento-Organic Chemistry, Nankai University, Tianjin 300071, China

E-mail: [lijc3@sustech.edu.cn](mailto:lijc3@sustech.edu.cn); [liuleoliu@sustech.edu.cn](mailto:liuleoliu@sustech.edu.cn); [hanqiangwang@gbu.edu.cn](mailto:hanqiangwang@gbu.edu.cn)

### Table of Contents

|                                                    |           |
|----------------------------------------------------|-----------|
| <b>I. Preparation of Starting Materials.....</b>   | <b>2</b>  |
| <b>II. Experimental Details .....</b>              | <b>3</b>  |
| <b>III. NMR Spectra .....</b>                      | <b>7</b>  |
| <b>IV. X-ray Crystallography .....</b>             | <b>17</b> |
| <b>V. Fourier Transform Infrared Spectrum.....</b> | <b>22</b> |
| <b>VI. Computational Details .....</b>             | <b>23</b> |
| <b>VII. Calculated Cartesian Coordinates.....</b>  | <b>30</b> |
| <b>VIII. References .....</b>                      | <b>59</b> |

## I. Preparation of Starting Materials

All manipulations were conducted within a nitrogen-filled glovebox or under a dry nitrogen atmosphere with indication, employing standard Schlenk techniques, unless otherwise specified. Toluene, *n*-hexane, and tetrahydrofuran (THF) were subjected to distillation over sodium or LiAlH<sub>4</sub> and subsequently stored using molecular sieves for purification. C<sub>6</sub>D<sub>6</sub>, CD<sub>2</sub>Cl<sub>2</sub> were obtained by soaking the molecular sieve, which had been dried by a vacuum oil pump in pipe furnace at 300 °C for three days. NMR spectra were acquired at 298 K on a Bruker Avance 400 and Bruker Avance NEO Ascend 500 (400 (<sup>1</sup>H: 400 MHz, <sup>13</sup>C{<sup>1</sup>H}: 101 MHz, <sup>11</sup>B{<sup>1</sup>H}: 128 MHz) 500 (<sup>1</sup>H: 500 MHz, <sup>13</sup>C{<sup>1</sup>H}: 126 MHz, <sup>11</sup>B{<sup>1</sup>H}: 160 MHz, <sup>19</sup>F{<sup>1</sup>H}: 471 MHz) NMR spectrometer. The provided data is presented as follows: chemical shift, multiplicity (s = singlet, d = doublet, t = triplet, q = quartet, sept = septet, m = multiplet and/or multiple resonances). High-resolution mass spectrometry (HRMS) was conducted using Thermo Fisher Scientific Q Exactive MS System and Thermo Fisher Scientific Orbitrap Exploris 120. Infrared spectra were recorded on Thermo Fisher Scientific Nicolet iS50. UV-Vis absorption spectra were measured on MAPADA UV-1800pc. Crystal data was collected on Bruker D8 QUEST Diffractometers respectively equipped with an Excillum METALJET diffractometer utilizing CuKα (λ = 1.54178), MoKα (λ = 0.71073) and GaKα (λ = 1.34138) radiation by APEX-III software suite. Commercial reagents were obtained from Energy Chemical, J&K or TCI Chemical, and were used without further purification. The abbreviations for the ligands and compounds are as follows: Dipp: 2,6-diisopropylphenyl. TMS: trimethylsilyl. <sup>Dipp</sup>NHI: (1,3-bis(2,6-diisopropylphenyl)-1,3-dihydro-2H-imidazol-2-ylidene)imino. <sup>Et</sup>CAAC: 1-(2,6-diisopropylphenyl)-3,3-diethyl-5,5-dimethylpyrrolidin-2-ylidene.

## II. Experimental Details

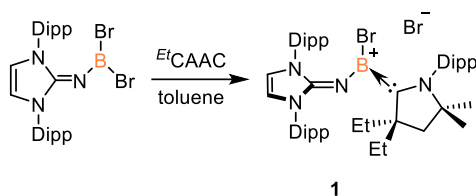

### Synthesis of **1**:

To a solution of *Et*CAAC (1.25 g, 4.00 mmol) in toluene (5 mL) at room temperature was slowly added a solution of *Dipp*NHIBBr<sub>2</sub> (2.29 g, 4.00 mmol) in toluene (6 mL) under vigorous stirring. The resulting orange-yellow suspension was stirred for 1.5 hours. The suspension was then filtered, and the collected solid was washed with toluene (3 × 3 mL). After drying under vacuum, compound **1** was obtained as an orange-yellow powder (3.23 g, 3.64 mmol) in 91.0% yield. Single crystals of **1** suitable for X-ray diffraction analysis were obtained from the THF solution at room temperature.

**<sup>1</sup>H NMR (500 MHz, CD<sub>2</sub>Cl<sub>2</sub>, 298 K, ppm):** δ 7.50 (t, <sup>3</sup>J<sub>H-H</sub> = 7.8 Hz, 2H, Ar-*H*), 7.43 (t, <sup>3</sup>J<sub>H-H</sub> = 7.8 Hz, 1H, Ar-*H*), 7.29 (d, <sup>3</sup>J<sub>H-H</sub> = 7.8 Hz, 4H, Ar-*H*), 7.14 (d, <sup>3</sup>J<sub>H-H</sub> = 7.8 Hz, 1H, Ar-*H*), 6.80 (s, 2H, HC=CH), 2.89 (sept, <sup>3</sup>J<sub>H-H</sub> = 6.8 Hz, 4H, CH(CH<sub>3</sub>)<sub>2</sub>), 2.28 (sept, *J* = 6.8 Hz, 2H, CH(CH<sub>3</sub>)<sub>2</sub>), 2.06 (s, 2H, <sup>cyclic</sup>CH<sub>2</sub>), 1.78 (m, 2H, <sup>Et</sup>CH<sub>2</sub>), 1.48-1.35 (m, 8H, <sup>Et</sup>CH<sub>2</sub>, CH<sub>3</sub>), 1.23 (d, <sup>3</sup>J<sub>H-H</sub> = 6.8 Hz, 12H, CH(CH<sub>3</sub>)<sub>2</sub>), 1.15 (d, <sup>3</sup>J<sub>H-H</sub> = 6.8 Hz, 6H, CH(CH<sub>3</sub>)<sub>2</sub>), 1.13 (d, <sup>3</sup>J<sub>H-H</sub> = 6.8 Hz, 12H, CH(CH<sub>3</sub>)<sub>2</sub>), 0.73 (d, <sup>3</sup>J<sub>H-H</sub> = 6.8 Hz, 6H, CH(CH<sub>3</sub>)<sub>2</sub>), 0.65 (t, <sup>3</sup>J<sub>H-H</sub> = 7.4 Hz, 6H, <sup>Et</sup>CH<sub>3</sub>).

**<sup>13</sup>C{<sup>1</sup>H} NMR (126 MHz, CD<sub>2</sub>Cl<sub>2</sub>, 298 K, ppm):** δ 152.36 (N=C), 146.93 (Ar-C), 144.88 (Ar-C), 131.84 (Ar-C), 131.75 (Ar-C), 131.55 (Ar-C), 131.51 (Ar-C), 131.47 (Ar-C), 126.18 (Ar-C), 119.64 (HC=CH), 84.70 (Cq), 63.28 (Cq), 40.25 (<sup>cyclic</sup>CH<sub>2</sub>), 31.28, 29.73, 29.58, 29.13, 25.90, 25.36, 25.22, 22.75, 10.02.

**<sup>11</sup>B{<sup>1</sup>H} NMR (160 MHz, CD<sub>2</sub>Cl<sub>2</sub>, 298 K, ppm):** δ 18.49 (br).

**HRMS (ESI): *m/z*: [M-Br]<sup>+</sup> calcd. for C<sub>49</sub>H<sub>71</sub>BN<sub>4</sub><sup>81</sup>Br<sup>+</sup> 805.4929, found 805.4918.**

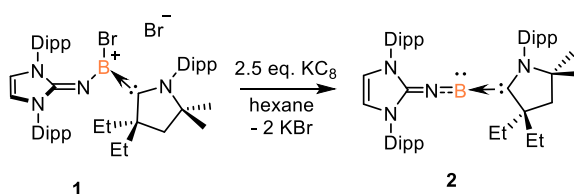

### Synthesis of 2:

To a solid mixture of **1** (1.77 g, 2.00 mmol) and  $\text{KC}_8$  (675 mg, 5.00 mmol) was added *n*-hexane (10 mL). The resulting mixture was stirred vigorously at room temperature for 48 hours. The mixture was then filtered, and the solid residue was washed with *n*-hexane ( $3 \times 5$  mL). The combined filtrate was concentrated under reduced pressure to approximately 3 mL. Recrystallization of the concentrated solution at  $-20$  °C afforded compound **2** as deep red crystals (1.11 g, 1.53 mmol) in 76.5% yield.

**$^1\text{H}$  NMR (400 MHz,  $\text{C}_6\text{D}_6$ , 298 K, ppm):**  $\delta$  7.15-7.20 (m, 3H, Ar-*H*), 7.04 (m, 6H, Ar-*H*), 5.80 (s, 2H, HC=CH), 3.68 (sept,  $^3J_{\text{H-H}} = 6.9$  Hz, 2H,  $\text{CH}(\text{CH}_3)_2$ ), 3.02 (sept,  $^3J_{\text{H-H}} = 6.9$  Hz, 4H,  $\text{CH}(\text{CH}_3)_2$ ), 1.88 (s, 2H, *cyclic*  $\text{CH}_2$ ), 1.38-1.31 (m, 4H,  $\text{EtCH}_2$ ), 1.31 (d,  $^3J_{\text{H-H}} = 6.9$  Hz, 6H,  $\text{CH}(\text{CH}_3)_2$ ), 1.22 (m, 18H,  $\text{CH}(\text{CH}_3)_2$ ,  $\text{CH}_3$ ), 1.12 (d,  $^3J_{\text{H-H}} = 6.9$  Hz, 12H,  $\text{CH}(\text{CH}_3)_2$ ), 0.91 (d,  $^3J_{\text{H-H}} = 6.9$  Hz, 6H,  $\text{CH}(\text{CH}_3)_2$ ), 0.78 (t,  $^3J_{\text{H-H}} = 7.4$  Hz, 6H,  $\text{EtCH}_3$ ).

**$^{13}\text{C}\{^1\text{H}\}$  NMR (101 MHz,  $\text{C}_6\text{D}_6$ , 298 K, ppm):**  $\delta$  152.01 (N=C), 147.93 (Ar-C), 133.83 (Ar-C), 129.65 (Ar-C), 126.10 (Ar-C), 124.21 (Ar-C), 124.01 (Ar-C), 115.79 (HC=CH), 64.26 (Cq), 52.36 (Cq), 34.53 (*cyclic*  $\text{CH}_2$ ), 30.02, 28.95, 28.18, 27.33, 24.49, 24.29, 23.63, 10.98.

**$^{11}\text{B}\{^1\text{H}\}$  NMR (128 MHz,  $\text{C}_6\text{D}_6$ , 298 K, ppm):**  $\delta$  57.64 (br).

**HRMS (ESI):  $m/z$ :  $[\text{M}+\text{H}]^+$  calcd. for  $\text{C}_{49}\text{H}_{72}\text{BN}_4^+$  727.5845, found 727.5851.**

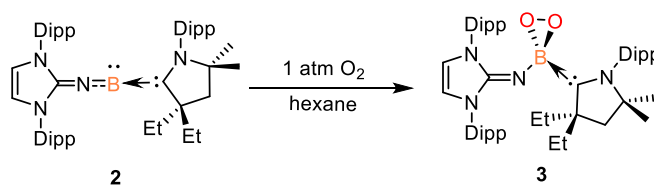

### Synthesis of 3:

Oxygen (99.5% purity, dry) was purged through a solution of **2** (257 mg, 0.354 mmol) in *n*-hexane (10 mL), and the mixture was stirred for 10 minutes  $-20$  °C. Upon exposure to oxygen, the deep red solution rapidly turned light yellow. The resulting mixture was soon filtered, and the residue was washed with *n*-hexane ( $3 \times 2$  mL). The combined filtrate was concentrated under reduced pressure to approximately 1 mL. Recrystallization from *n*-hexane at  $-20$  °C afforded compound **3** as yellow crystals (117 mg, 0.154 mmol) in 43.5% yield. **Caution: 3 is unstable at room temperature.**

**<sup>1</sup>H NMR (500 MHz, C<sub>6</sub>D<sub>6</sub>, 298 K, ppm):** δ 7.29 (t, <sup>3</sup>J<sub>H-H</sub> = 7.7 Hz, 2H, Ar-*H*), 7.17 (d, <sup>3</sup>J<sub>H-H</sub> = 7.7 Hz, 4H, Ar-*H*), 7.10 (d, <sup>3</sup>J<sub>H-H</sub> = 7.6 Hz, 1H, Ar-*H*), 7.00 (d, <sup>3</sup>J<sub>H-H</sub> = 7.8 Hz, 2H, Ar-*H*), 5.97 (s, 2H, HC=CH), 3.35 (sept, <sup>3</sup>J<sub>H-H</sub> = 6.9 Hz, 4H, CH(CH<sub>3</sub>)<sub>2</sub>), 2.60 (sept, <sup>3</sup>J<sub>H-H</sub> = 6.6 Hz, 2H, CH(CH<sub>3</sub>)<sub>2</sub>), 1.80-1.94 (m, 4H, <sup>Et</sup>CH<sub>2</sub>), 1.41 (d, <sup>3</sup>J<sub>H-H</sub> = 6.9 Hz, 12H, CH(CH<sub>3</sub>)<sub>2</sub>), 1.40 (s, 2H, <sup>cyclic</sup>CH<sub>2</sub>), 1.29 (d, <sup>3</sup>J<sub>H-H</sub> = 6.6 Hz, 6H, CH(CH<sub>3</sub>)<sub>2</sub>), 1.25 (d, <sup>3</sup>J<sub>H-H</sub> = 6.9 Hz, 12H, CH(CH<sub>3</sub>)<sub>2</sub>), 1.16 (d, <sup>3</sup>J<sub>H-H</sub> = 6.6 Hz, 6H, CH(CH<sub>3</sub>)<sub>2</sub>), 0.78 (s, 6H, CH<sub>3</sub>), 0.68 (t, <sup>3</sup>J<sub>H-H</sub> = 7.4 Hz, 6H, <sup>Et</sup>CH<sub>3</sub>).

**<sup>13</sup>C{<sup>1</sup>H} NMR (101 MHz, C<sub>6</sub>D<sub>6</sub>, 298 K, ppm):** δ 148.14 (N=C), 144.86 (Ar-C), 137.63 (Ar-C), 134.19 (Ar-C), 124.13 (Ar-C), 124.02 (Ar-C), 123.07 (Ar-C), 114.93 (HC=CH), 78.19 (C<sub>q</sub>), 61.76 (C<sub>q</sub>), 40.53 (<sup>cyclic</sup>CH<sub>2</sub>), 29.66, 29.59, 29.07, 28.92, 28.79, 26.76, 26.59, 25.61, 24.46, 23.78, 23.36, 22.59, 9.83.

**<sup>11</sup>B{<sup>1</sup>H} NMR (128 MHz, C<sub>6</sub>D<sub>6</sub>, 298 K, ppm):** δ -2.79 (s).

**HRMS (ESI): *m/z*: [M+H]<sup>+</sup> calcd. for C<sub>49</sub>H<sub>72</sub>BN<sub>4</sub>O<sub>2</sub><sup>+</sup> 759.5743, found 759.5739.**

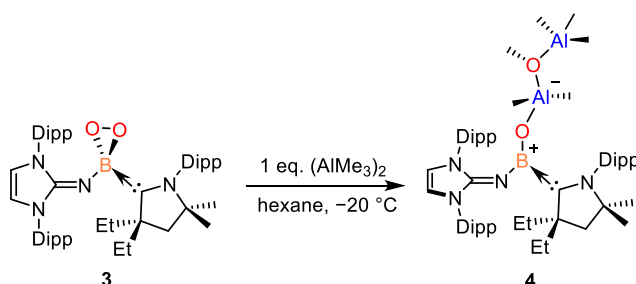

### Synthesis of 4:

To a solution of **3** (76 mg, 0.100 mmol) in *n*-hexane (5 mL) at -20 °C was added trimethylaluminum (2 M, 100 μL, 0.20 mmol). The resulting mixture was stirred at -20 °C for 10 hours. The pale suspension was filtered, and the solid was washed with *n*-hexane (3 × 2 mL) to afford compound **4**. Single crystals of **4** suitable for X-ray diffraction analysis were obtained by cooling a saturated toluene solution to -20 °C in 71.3% yield (64 mg, 0.071 mmol).

**<sup>1</sup>H NMR (500 MHz, C<sub>6</sub>D<sub>6</sub>, 298 K, ppm):** δ 7.13-7.10 (m, 5H, Ar-*H*), 7.07–6.95 (m, 2H, Ar-*H*), 6.88 (d, <sup>3</sup>J<sub>H-H</sub> = 7.8 Hz, 2H, Ar-*H*), 5.81 (s, 2H, HC=CH), 2.85 (sept, <sup>3</sup>J<sub>H-H</sub> = 6.7 Hz, 4H, CH(CH<sub>3</sub>)<sub>2</sub>), 2.72 (s, 3H, OCH<sub>3</sub>), 2.52 (m, 2H, CH(CH<sub>3</sub>)<sub>2</sub>), 1.52 (d, <sup>3</sup>J<sub>H-H</sub> = 6.7 Hz, 6H, CH(CH<sub>3</sub>)<sub>2</sub>), 1.40 (s, 2H, <sup>cyclic</sup>CH<sub>2</sub>), 1.34-1.27 (m, 4H, <sup>Et</sup>CH<sub>2</sub>), 1.13-1.09 (m, 9H, CH(CH<sub>3</sub>)<sub>2</sub>), 1.05 (d, <sup>3</sup>J<sub>H-H</sub> = 6.6 Hz, 6H, CH(CH<sub>3</sub>)<sub>2</sub>), 0.97 (m, 15H, CH(CH<sub>3</sub>)<sub>2</sub>), 0.63 (s, 6H, CH<sub>3</sub>), 0.60 (t, <sup>3</sup>J<sub>H-H</sub> = 7.4 Hz, 6H, <sup>Et</sup>CH<sub>3</sub>), -0.03 (s, 9H, Al(CH<sub>3</sub>)<sub>3</sub>), -0.37 (s, 6H, Al(CH<sub>3</sub>)<sub>2</sub>).

$^{13}\text{C}\{^1\text{H}\}$  NMR (126 MHz,  $\text{C}_6\text{D}_6$ , 298 K, ppm):  $\delta$  148.98 (C=N), 146.84 (Ar-C), 135.29 (Ar-C), 131.16 (Ar-C), 130.65 (Ar-C), 129.99 (Ar-C), 125.54 (Ar-C), 125.32 (Ar-C), 123.84 (Ar-C), 116.95 (HC=CH), 81.45 (Cq), 60.88 (Cq), 50.48 ( $\text{Al}(\text{CH}_3)_2\text{OCH}_3$ ), 39.73 (*cyclic*CH<sub>2</sub>), 31.45, 29.44, 28.75, 28.26, 28.12, 27.23, 26.10, 23.96, 22.96, 22.67, 15.60, 14.35, 10.90, -3.63 ( $\text{Al}(\text{CH}_3)_2\text{OCH}_3$ ), -6.18 ( $\text{Al}(\text{CH}_3)_3$ ).

$^{11}\text{B}\{^1\text{H}\}$  NMR (160 MHz,  $\text{C}_6\text{D}_6$ , 298 K, ppm):  $\delta$  18.22 (s).

HRMS (ESI): *m/z*:  $[\text{M}+\text{H}]^+$  calcd. for  $\text{C}_{55}\text{H}_{90}\text{Al}_2\text{BN}_4\text{O}_2^+$ , 903.6782, found 903.6788.

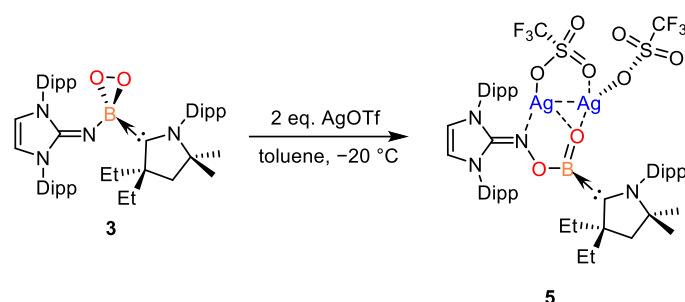

### Synthesis of 5:

To a solid mixture of **3** (76 mg, 0.100 mmol) and silver trifluoromethanesulfonate (53 mg, 0.200 mmol) at  $-20\text{ }^\circ\text{C}$  was rapidly added toluene (10 mL). The resulting mixture was stirred at  $-20\text{ }^\circ\text{C}$  for 12 hours. The mixture was then filtered, and the solid residue was washed with a 2:1 (V/V) mixture of *n*-hexane/toluene ( $3 \times 6\text{ mL}$ ) to afford compound **5** as an orange powder (88 mg, 0.0705 mmol) in 70.5% yield. Single crystals of **5** suitable for X-ray diffraction analysis were obtained by cooling a saturated toluene solution to  $-20\text{ }^\circ\text{C}$ .

$^1\text{H}$  NMR (500 MHz,  $\text{C}_6\text{D}_6$ , 298 K, ppm):  $\delta$  7.57 (t,  $^3J_{\text{H-H}} = 7.8\text{ Hz}$ , 1H, Ar-*H*), 7.42 (t,  $^3J_{\text{H-H}} = 7.7\text{ Hz}$ , 1H, Ar-*H*), 7.28 (d,  $^3J_{\text{H-H}} = 7.8\text{ Hz}$ , 2H, Ar-*H*), 7.11-7.16 (m, 3H, Ar-*H*), 7.03 (d,  $^3J_{\text{H-H}} = 7.7\text{ Hz}$ , 2H, Ar-*H*), 5.66 (d,  $^3J_{\text{H-H}} = 2.6\text{ Hz}$ , 1H, HC=CH), 5.54 (d,  $^3J_{\text{H-H}} = 2.6\text{ Hz}$ , 1H, HC=CH), 3.02 (sept,  $^3J_{\text{H-H}} = 6.9\text{ Hz}$ , 2H,  $\text{CH}(\text{CH}_3)_2$ ), 2.79 (sept,  $^3J_{\text{H-H}} = 6.9\text{ Hz}$ , 2H,  $\text{CH}(\text{CH}_3)_2$ ), 2.43 (sept,  $^3J_{\text{H-H}} = 6.9\text{ Hz}$ , 2H,  $\text{CH}(\text{CH}_3)_2$ ), 1.68 (s, 2H, *cyclic*CH<sub>2</sub>), 1.39 (m, 12H,  $\text{CH}(\text{CH}_3)_2$ ,  $\text{CH}_2\text{CH}_3$ ), 1.38 (d,  $^3J_{\text{H-H}} = 6.9\text{ Hz}$ , 6H,  $\text{CH}(\text{CH}_3)_2$ ), 1.27 (d,  $^3J_{\text{H-H}} = 6.9\text{ Hz}$ , 6H,  $\text{CH}(\text{CH}_3)_2$ ), 1.11 (m, 12H,  $\text{CH}(\text{CH}_3)_2$ ), 1.05 (d,  $^3J_{\text{H-H}} = 6.9\text{ Hz}$ , 6H,  $\text{CH}(\text{CH}_3)_2$ ), 0.93 (s, 6H,  $(\text{CH}_3)_2$ ), 0.80-0.65 (m, 10H,  $\text{CH}(\text{CH}_3)_2$ ,  $\text{CH}_2\text{CH}_3$ ).

$^{13}\text{C}\{^1\text{H}\}$  NMR (126 MHz,  $\text{C}_6\text{D}_6$ , ppm):  $\delta$  149.04 (C=N), 146.39 (Ar-C), 146.07 (Ar-C), 144.94 (Ar-C), 135.73 (Ar-C), 132.59 (Ar-C), 132.08 (Ar-C), 130.62 (Ar-C), 129.91 (Ar-C), 129.37 (Ar-



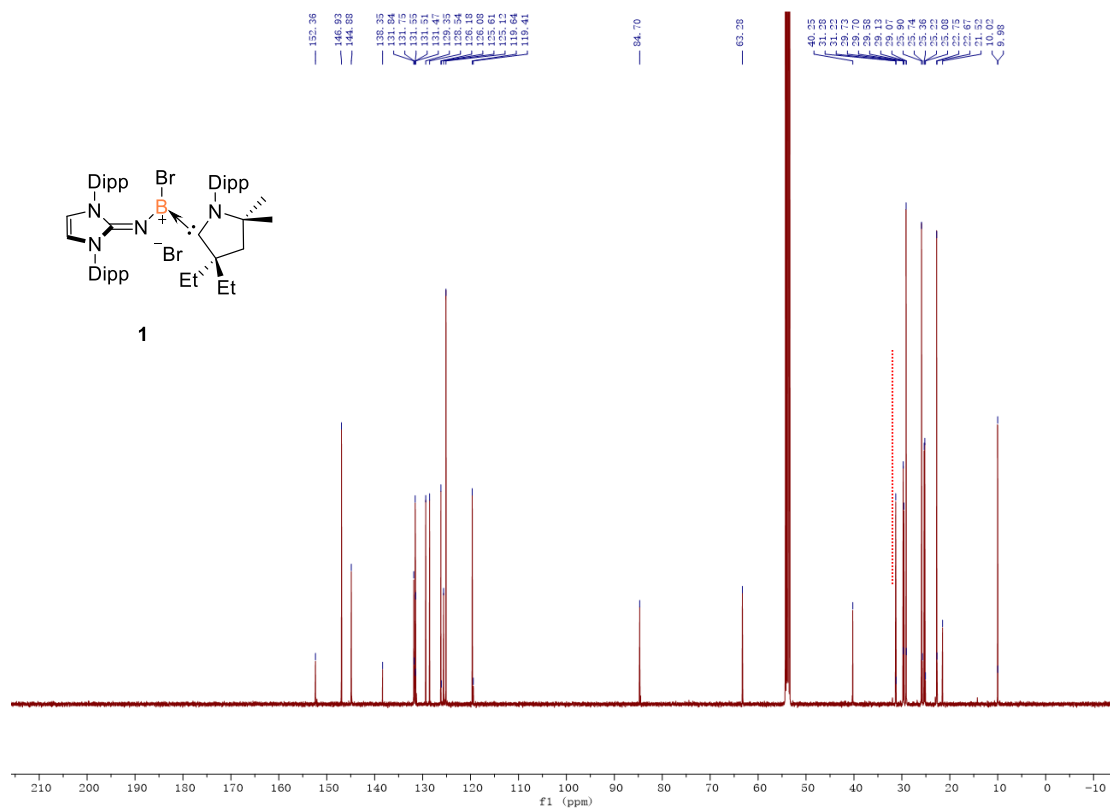

**Figure S2.**  $^{13}\text{C}\{^1\text{H}\}$  NMR (126 MHz,  $\text{CD}_2\text{Cl}_2$ ) spectrum of **1**.

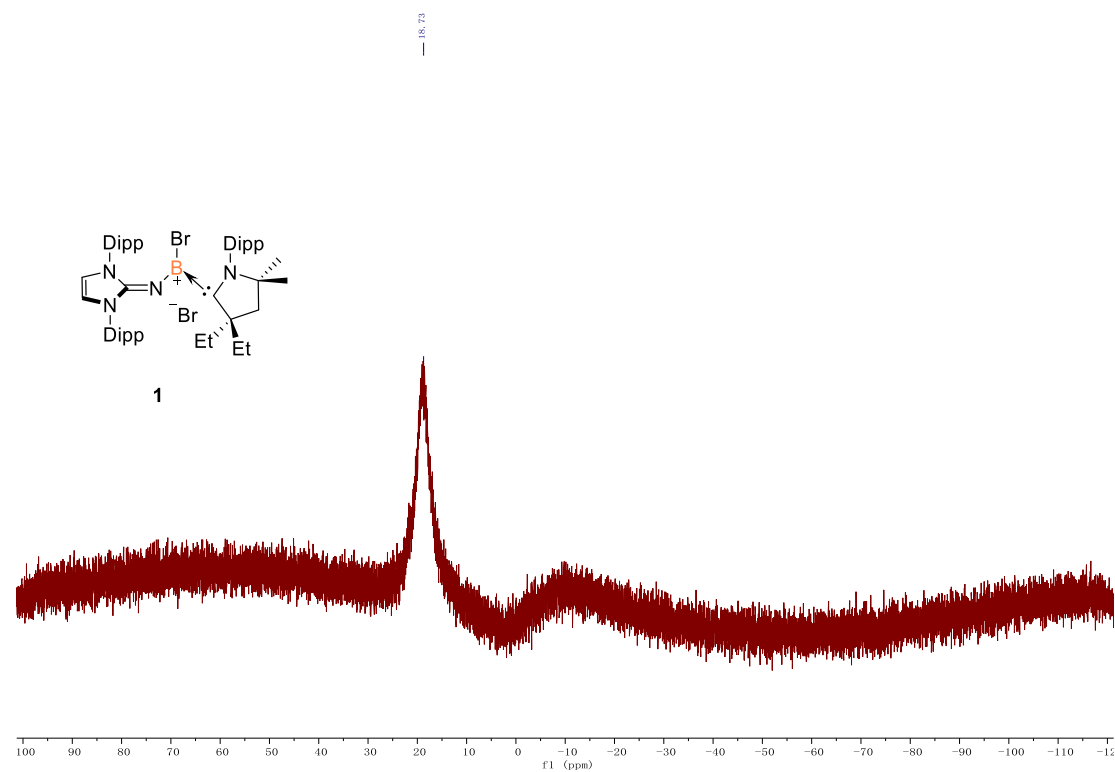

**Figure S3.**  $^{11}\text{B}\{^1\text{H}\}$  NMR (160 MHz,  $\text{CD}_2\text{Cl}_2$ ) spectrum of **1**.

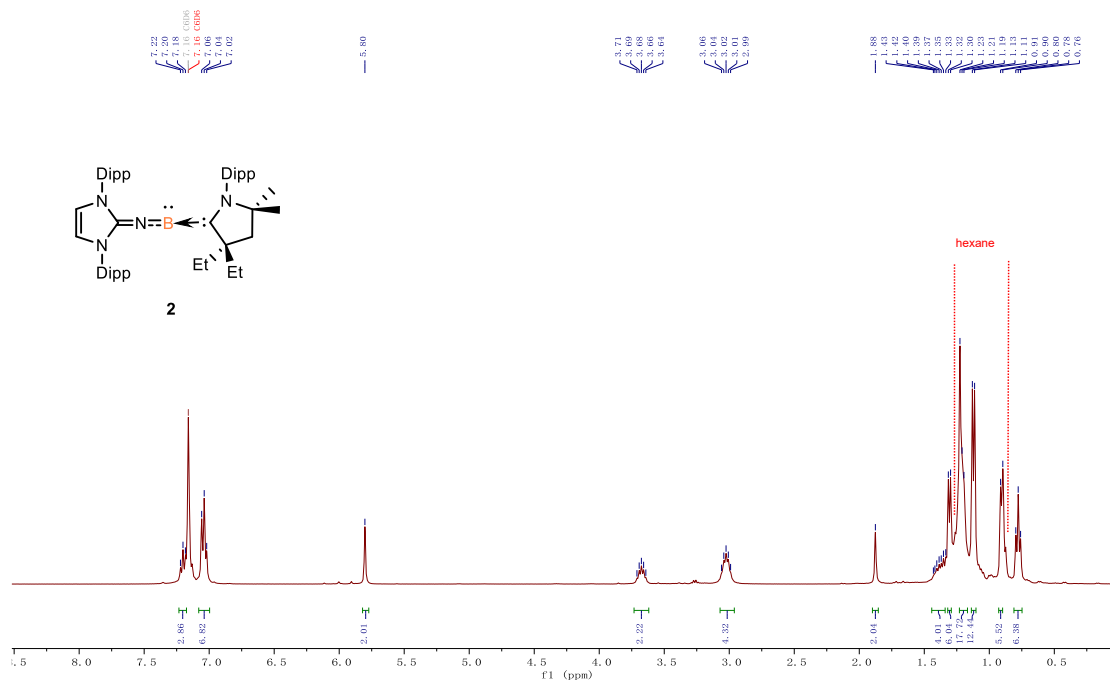

**Figure S4.**  $^1\text{H}$  NMR (400 MHz,  $\text{C}_6\text{D}_6$ ) spectrum of **2**.

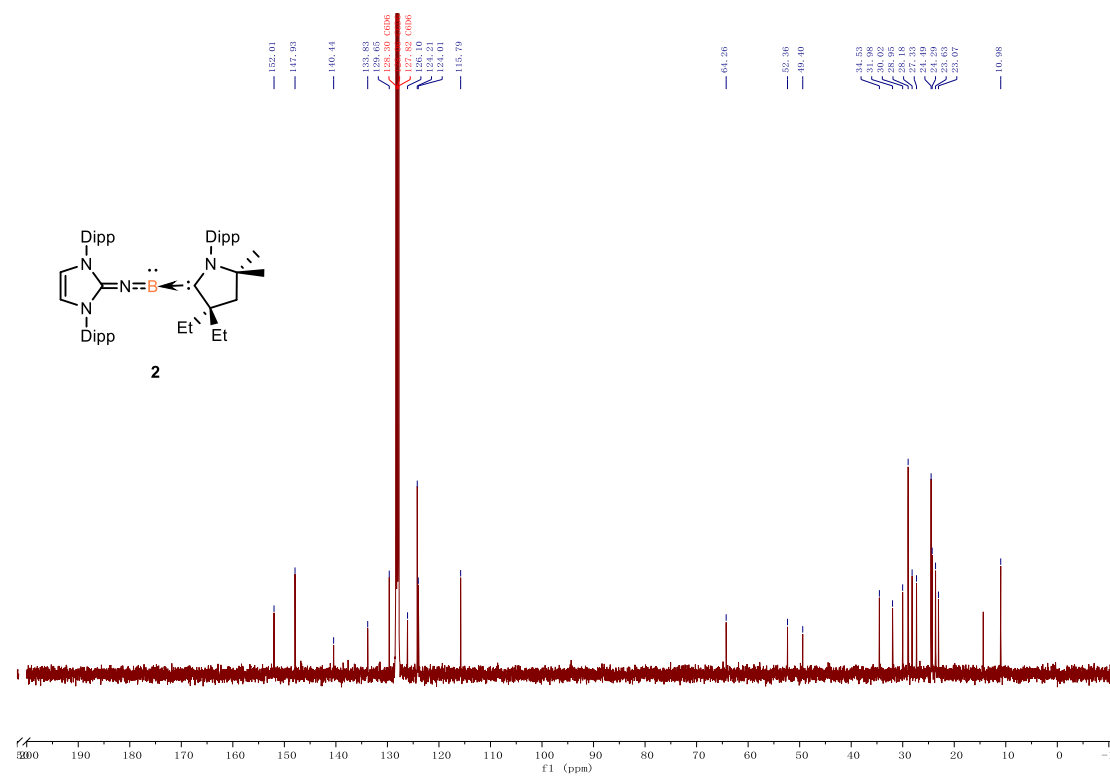

**Figure S5.**  $^{13}\text{C}\{^1\text{H}\}$  NMR (101 MHz,  $\text{C}_6\text{D}_6$ ) spectrum of **2**.

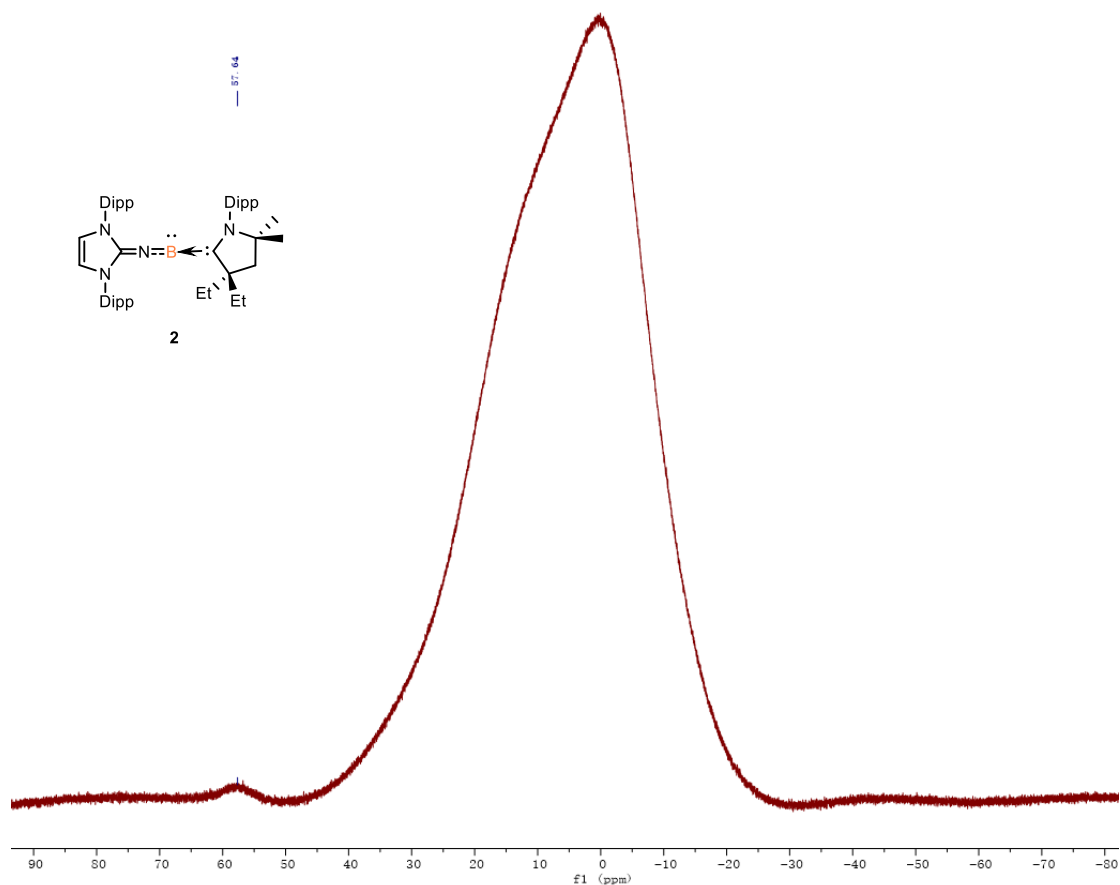

**Figure S6.**  $^{11}\text{B}\{^1\text{H}\}$  NMR (128 MHz,  $\text{C}_6\text{D}_6$ ) spectrum of **2**.

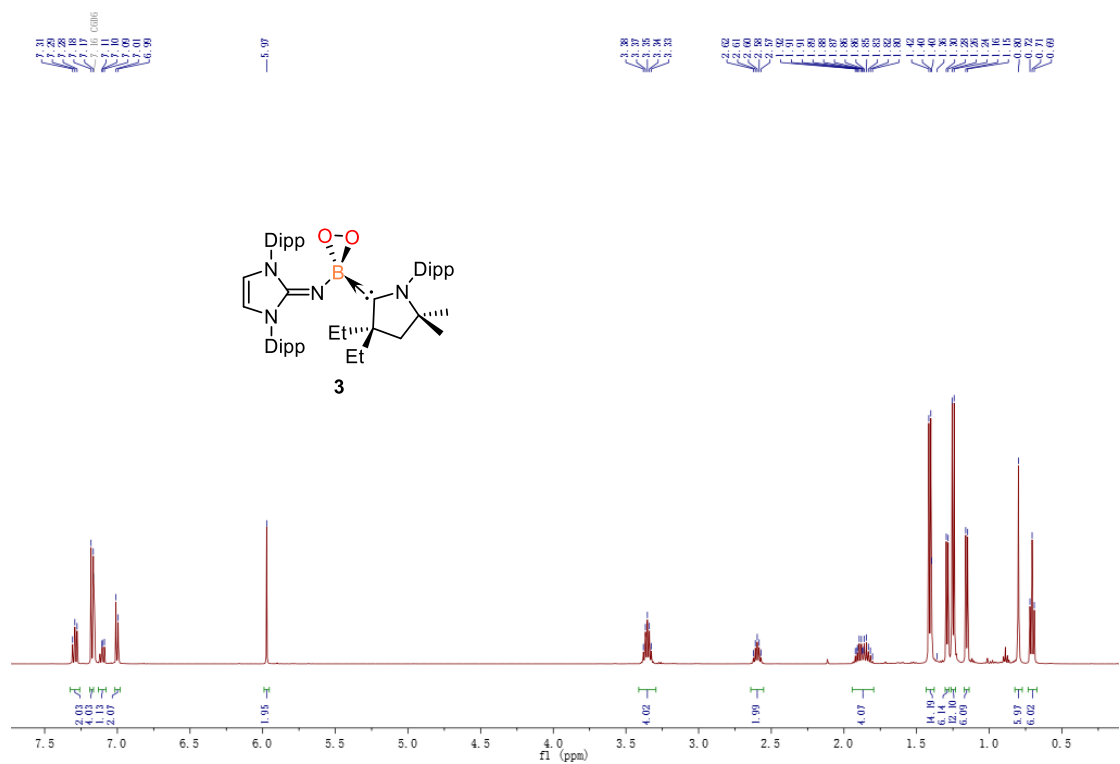

**Figure S7.**  $^1\text{H}$  NMR (500 MHz,  $\text{C}_6\text{D}_6$ ) spectrum of **3**.

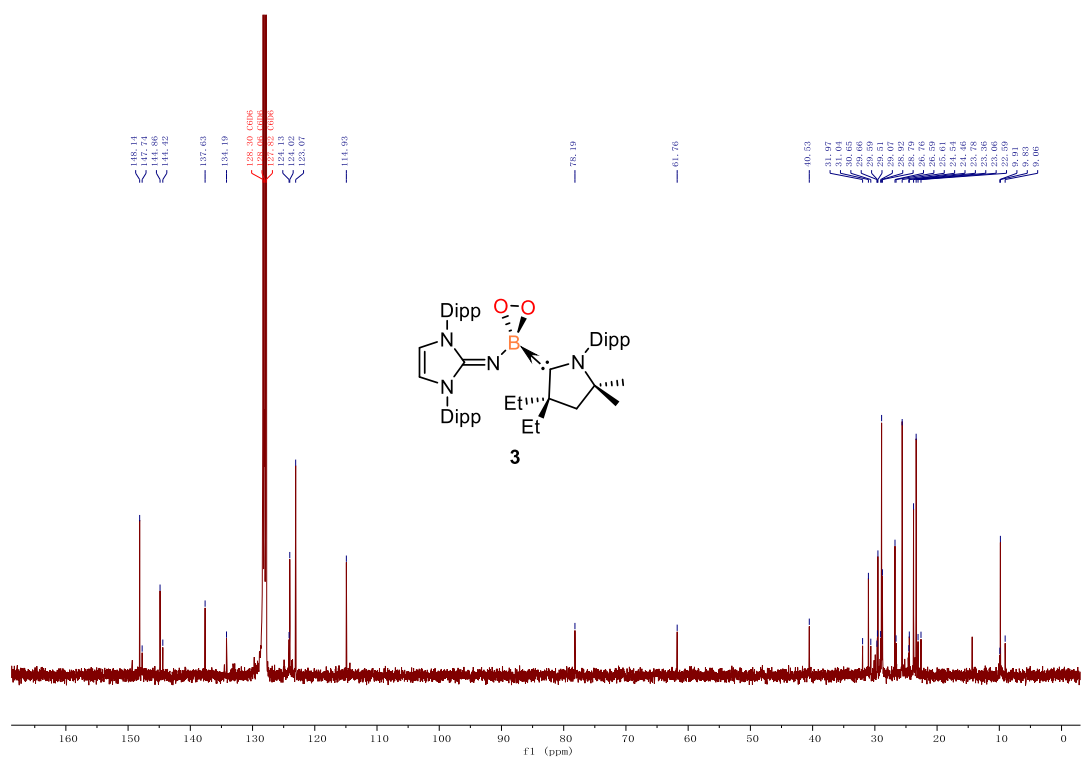

**Figure S8.**  $^{13}\text{C}\{^1\text{H}\}$  NMR (101 MHz,  $\text{C}_6\text{D}_6$ ) spectrum of **3**.

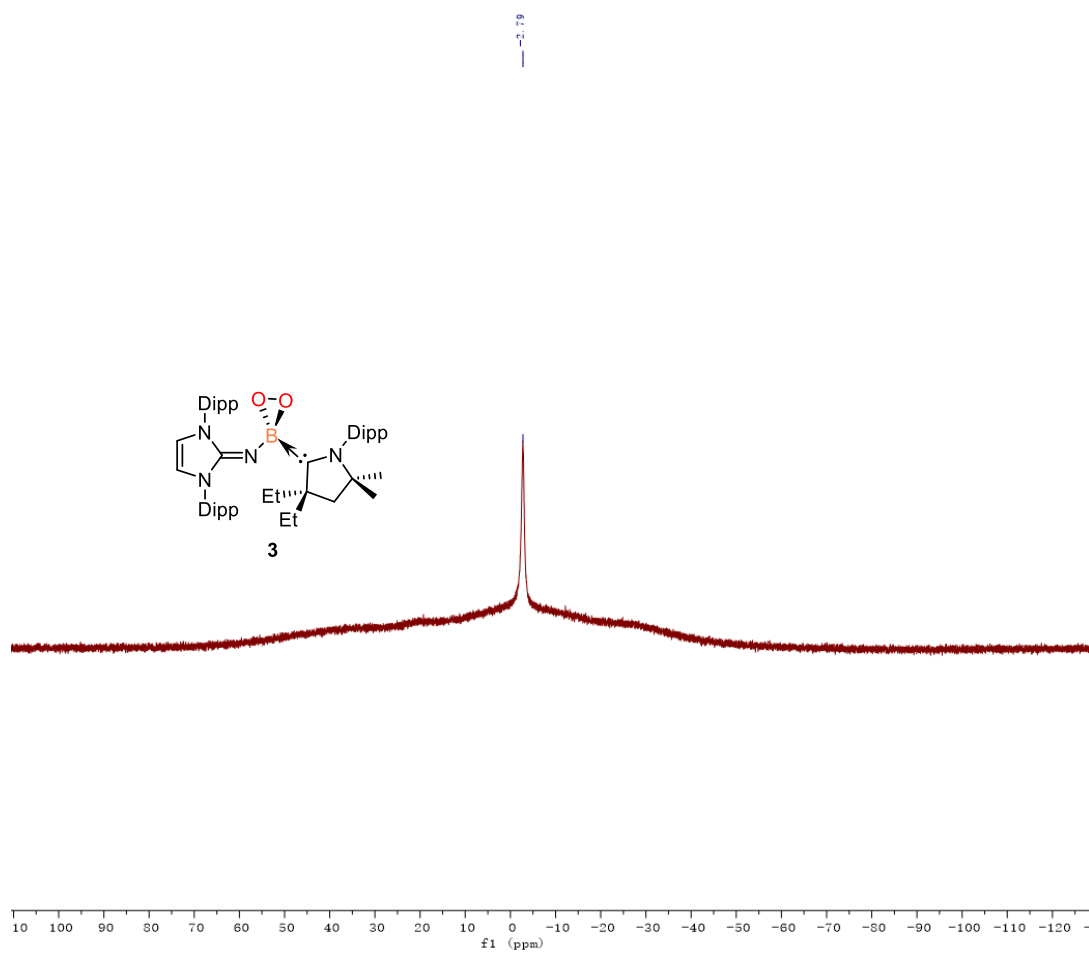

**Figure S9.**  $^{11}\text{B}\{^1\text{H}\}$  NMR (128 MHz,  $\text{C}_6\text{D}_6$ ) spectrum of **3**.

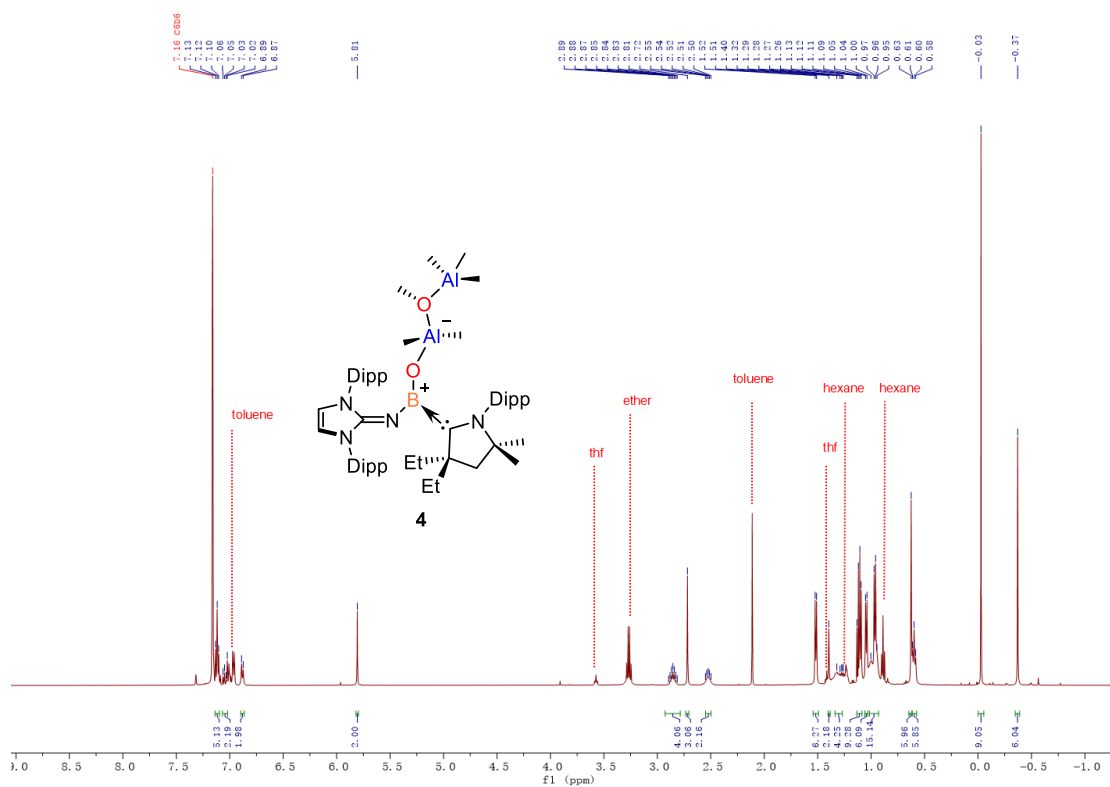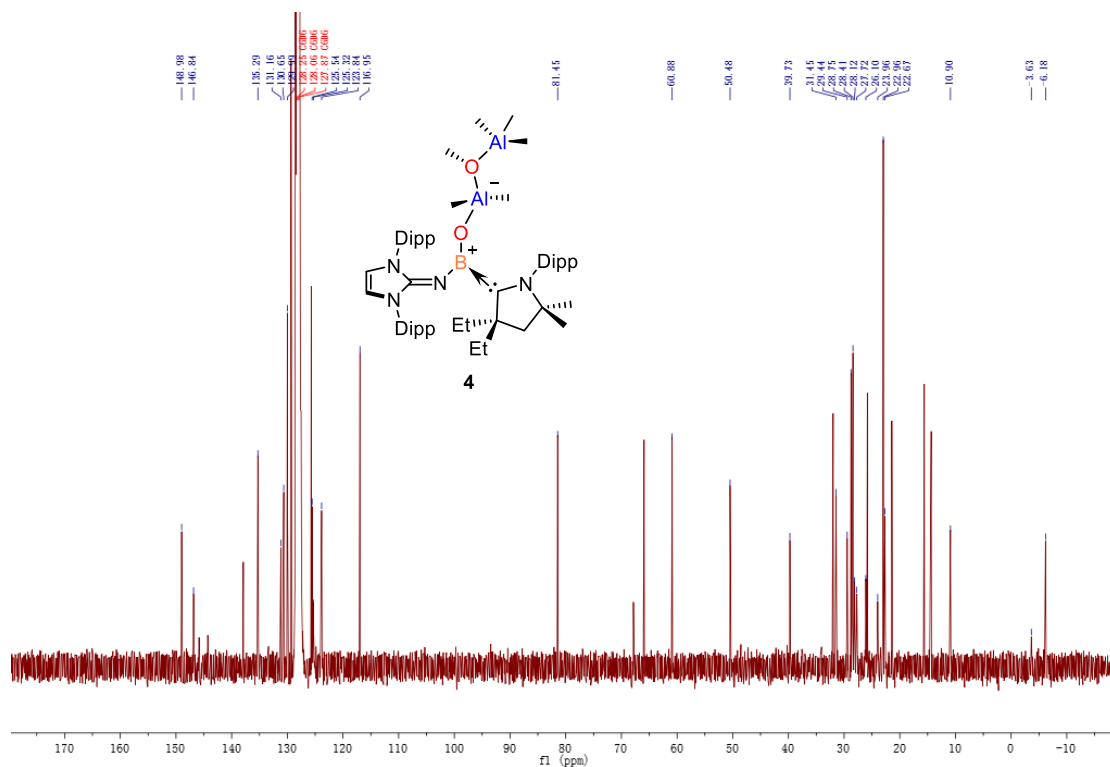

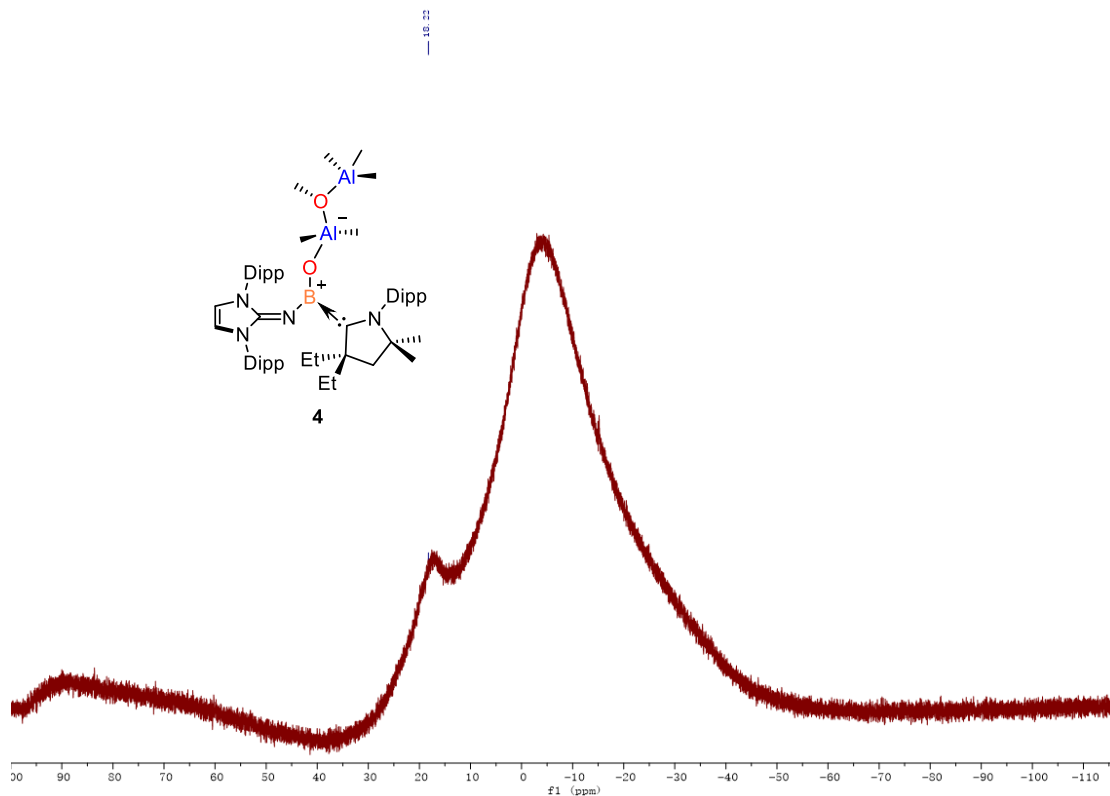

Figure S12.  $^{11}\text{B}\{^1\text{H}\}$  NMR (160 MHz,  $\text{C}_6\text{D}_6$ ) spectrum of **4**.

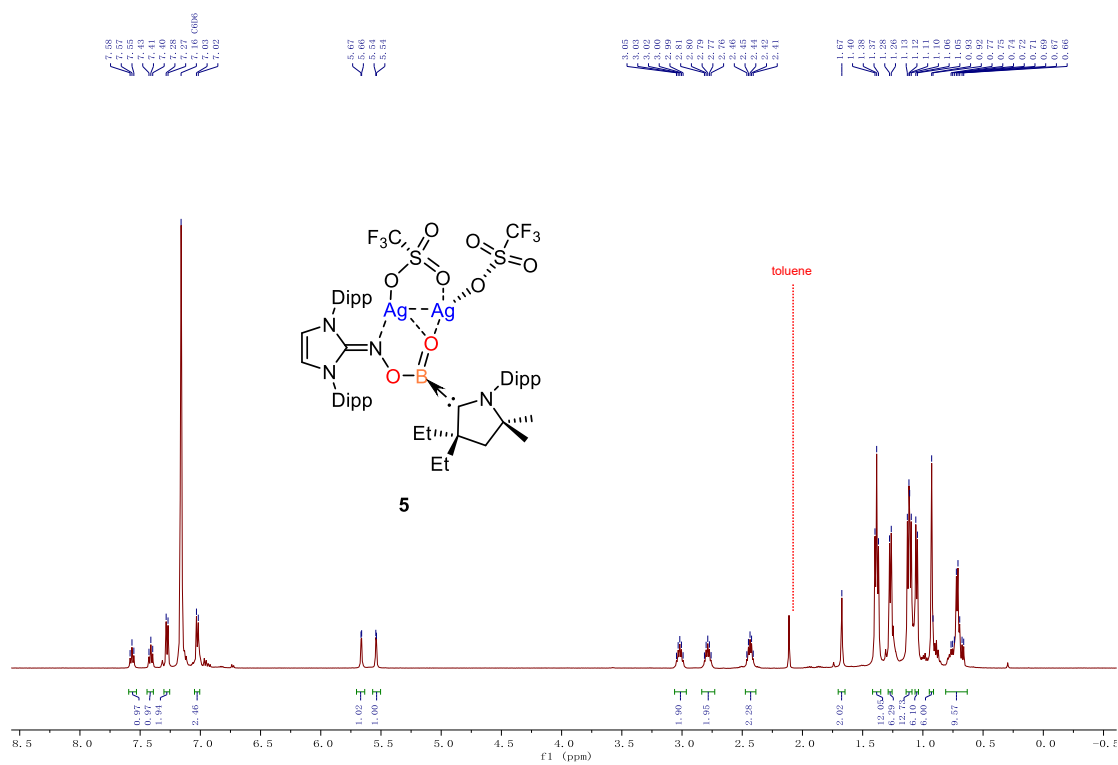

Figure S13.  $^1\text{H}$  NMR (500 MHz,  $\text{C}_6\text{D}_6$ ) spectrum of **5**.

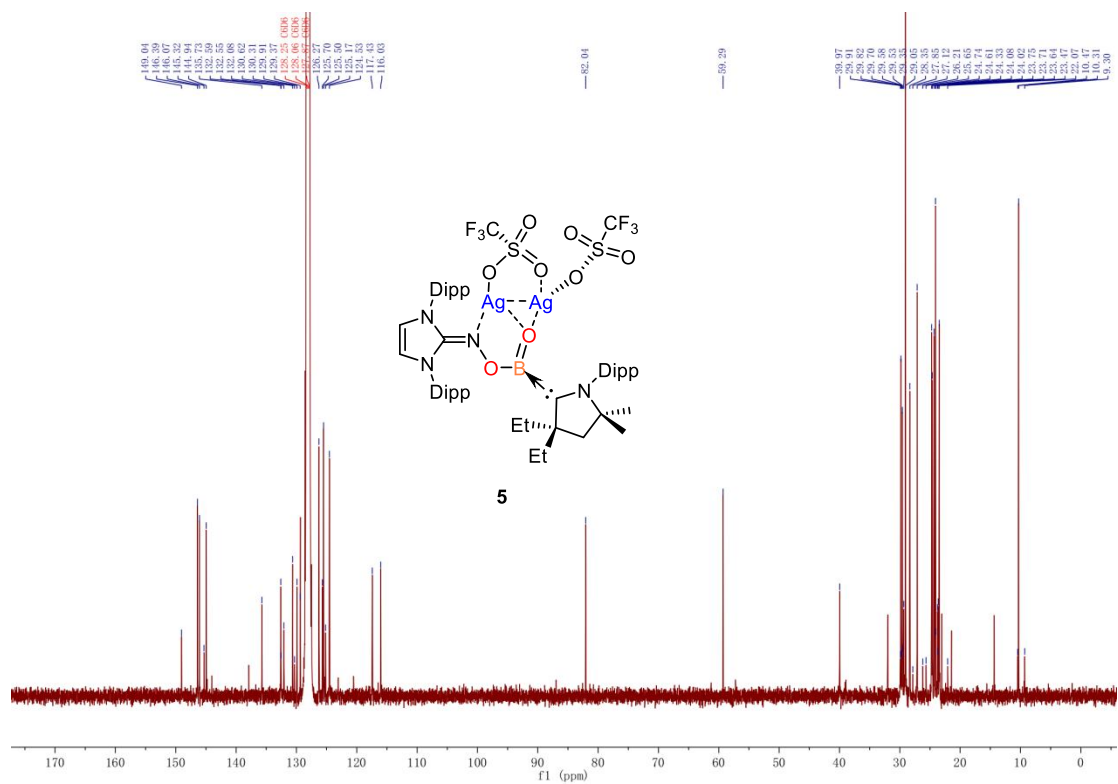

**Figure S14.**  $^{13}\text{C}\{^1\text{H}\}$  NMR (126 MHz,  $\text{C}_6\text{D}_6$ ) spectrum of **5**.

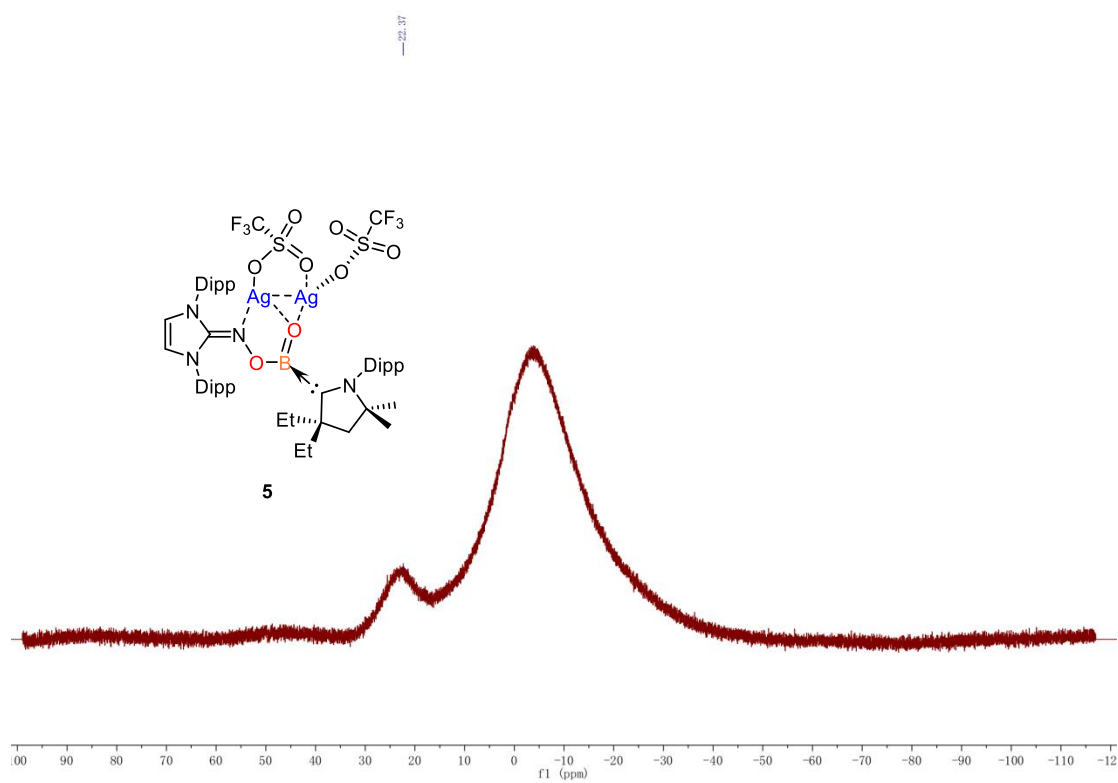

**Figure S15.**  $^{11}\text{B}\{^1\text{H}\}$  NMR (160 MHz,  $\text{C}_6\text{D}_6$ ) spectrum of **5**.

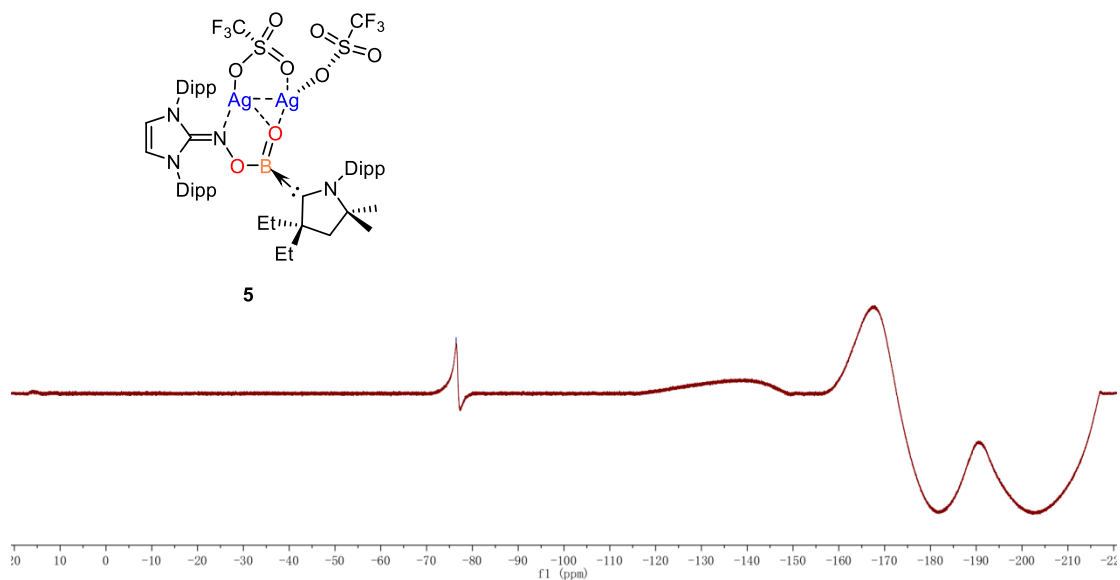

**Figure S16.** <sup>19</sup>F NMR (471 MHz, C<sub>6</sub>D<sub>6</sub>) spectrum of **5**.

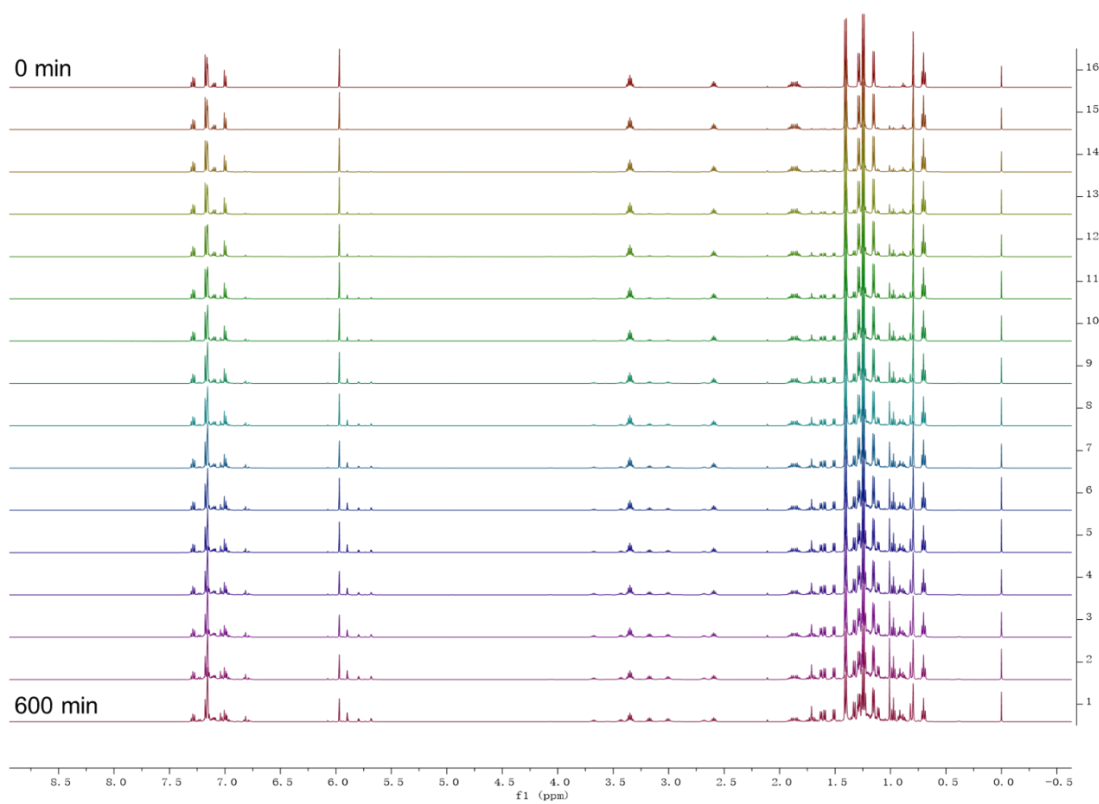

**Figure S17.** The decomposition of **3** was monitored by <sup>1</sup>H NMR in C<sub>6</sub>D<sub>6</sub> at 298 K using Si(CH<sub>3</sub>)<sub>4</sub> as an internal standard within 40-minute intervals.

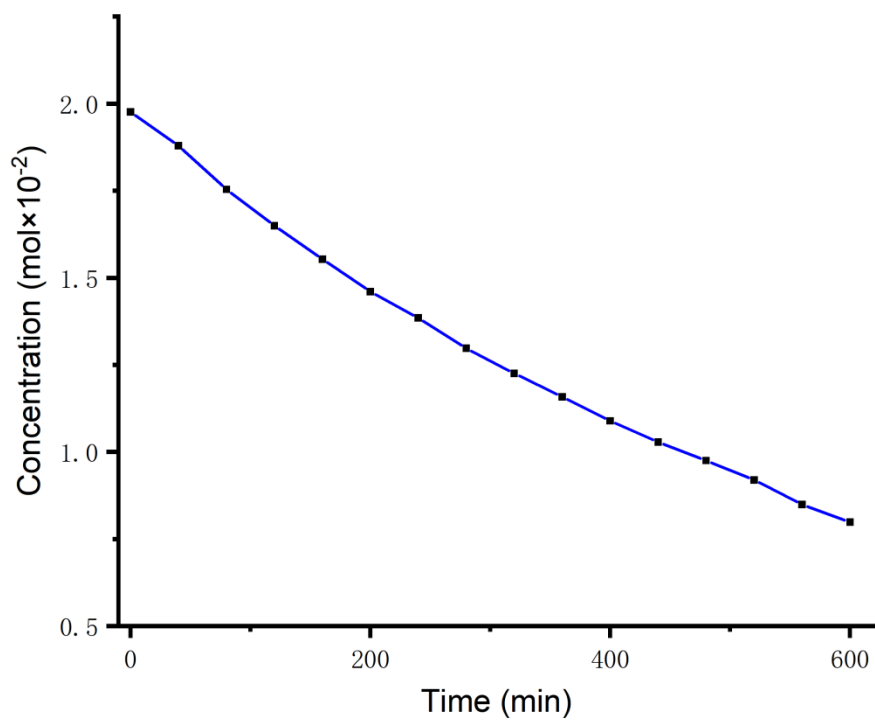

**Figure S18.** The relationship between concentration ( $10^{-2}$  M) and time (min) for the decomposition of **3** in  $C_6D_6$ .

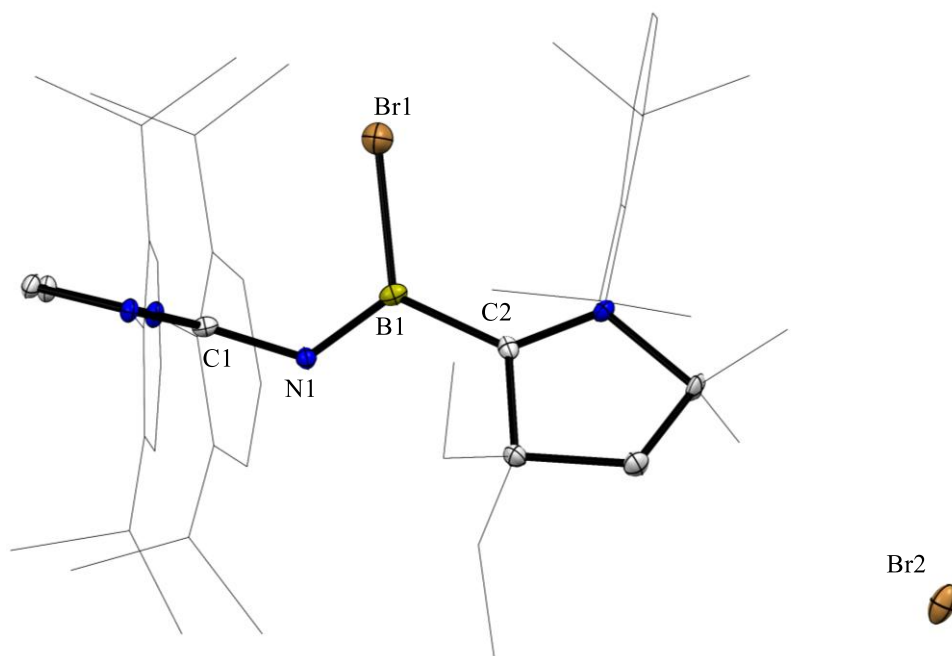

**Figure S19.** Solid-state structure of **1**. Anisotropic displacement ellipsoids are shown at the 30% probability level. Hydrogen atoms are omitted for clarity.

## IV.X-ray Crystallography

**Table S1. Crystal data and structure refinement for 1.**

|                                             |                                                                 |
|---------------------------------------------|-----------------------------------------------------------------|
| Identification code                         | 1 / 2552624                                                     |
| Empirical formula                           | C <sub>49</sub> H <sub>71</sub> BBR <sub>2</sub> N <sub>4</sub> |
| Formula weight                              | 886.72                                                          |
| Temperature/K                               | 100.0                                                           |
| Crystal system                              | monoclinic                                                      |
| Space group                                 | P2 <sub>1</sub> /n                                              |
| a/Å                                         | 13.6053(12)                                                     |
| b/Å                                         | 25.104(2)                                                       |
| c/Å                                         | 15.4687(13)                                                     |
| α/°                                         | 90                                                              |
| β/°                                         | 110.476(3)                                                      |
| γ/°                                         | 90                                                              |
| Volume/Å <sup>3</sup>                       | 4949.4(7)                                                       |
| Z                                           | 4                                                               |
| ρ <sub>calc</sub> /cm <sup>3</sup>          | 1.190                                                           |
| μ/mm <sup>-1</sup>                          | 1.534                                                           |
| F(000)                                      | 1872.0                                                          |
| Crystal size/mm <sup>3</sup>                | 0.201 × 0.12 × 0.081                                            |
| Radiation                                   | GaKα (λ = 1.34138)                                              |
| 2θ range for data collection/°              | 6.126 to 114.262                                                |
| Index ranges                                | -16 ≤ h ≤ 16, -31 ≤ k ≤ 31, -18 ≤ l ≤ 19                        |
| Reflections collected                       | 45424                                                           |
| Independent reflections                     | 10036 [R <sub>int</sub> = 0.0843, R <sub>sigma</sub> = 0.0869]  |
| Data/restraints/parameters                  | 10036/0/521                                                     |
| Goodness-of-fit on F <sup>2</sup>           | 1.072                                                           |
| Final R indexes [I >= 2σ (I)]               | R <sub>1</sub> = 0.0588, wR <sub>2</sub> = 0.1538               |
| Final R indexes [all data]                  | R <sub>1</sub> = 0.0973, wR <sub>2</sub> = 0.1696               |
| Largest diff. peak/hole / e Å <sup>-3</sup> | 0.83/-1.52                                                      |

**Table S2. Crystal data and structure refinement for 2.**

|                                             |                                                               |
|---------------------------------------------|---------------------------------------------------------------|
| Identification code                         | 2 / 2552625                                                   |
| Empirical formula                           | C <sub>52</sub> H <sub>78</sub> BN <sub>4</sub>               |
| Formula weight                              | 769.99                                                        |
| Temperature/K                               | 100.0                                                         |
| Crystal system                              | triclinic                                                     |
| Space group                                 | P-1                                                           |
| a/Å                                         | 9.4498(4)                                                     |
| b/Å                                         | 12.2199(5)                                                    |
| c/Å                                         | 21.1498(9)                                                    |
| α/°                                         | 84.786(3)                                                     |
| β/°                                         | 80.996(3)                                                     |
| γ/°                                         | 77.371(3)                                                     |
| Volume/Å <sup>3</sup>                       | 2349.76(17)                                                   |
| Z                                           | 2                                                             |
| ρ <sub>calc</sub> /cm <sup>3</sup>          | 1.088                                                         |
| μ/mm <sup>-1</sup>                          | 0.465                                                         |
| F(000)                                      | 846.0                                                         |
| Crystal size/mm <sup>3</sup>                | 0.152 × 0.086 × 0.046                                         |
| Radiation                                   | CuKα (λ = 1.54178)                                            |
| 2θ range for data collection/°              | 7.426 to 136.886                                              |
| Index ranges                                | -11 ≤ h ≤ 11, -14 ≤ k ≤ 14, -22 ≤ l ≤ 25                      |
| Reflections collected                       | 36115                                                         |
| Independent reflections                     | 8595 [R <sub>int</sub> = 0.0785, R <sub>sigma</sub> = 0.0707] |
| Data/restraints/parameters                  | 8595/0/532                                                    |
| Goodness-of-fit on F <sup>2</sup>           | 1.082                                                         |
| Final R indexes [I ≥ 2σ (I)]                | R <sub>1</sub> = 0.0736, wR <sub>2</sub> = 0.2026             |
| Final R indexes [all data]                  | R <sub>1</sub> = 0.1068, wR <sub>2</sub> = 0.2238             |
| Largest diff. peak/hole / e Å <sup>-3</sup> | 0.58/-0.39                                                    |

**Table S3. Crystal data and structure refinement for 3.**

|                                             |                                                                |
|---------------------------------------------|----------------------------------------------------------------|
| Identification code                         | 3 / 2552626                                                    |
| Empirical formula                           | C <sub>49</sub> H <sub>71</sub> BN <sub>4</sub> O <sub>2</sub> |
| Formula weight                              | 758.90                                                         |
| Temperature/K                               | 100.00                                                         |
| Crystal system                              | triclinic                                                      |
| Space group                                 | P-1                                                            |
| a/Å                                         | 9.4460(8)                                                      |
| b/Å                                         | 12.0085(9)                                                     |
| c/Å                                         | 19.9587(15)                                                    |
| α/°                                         | 95.716(5)                                                      |
| β/°                                         | 91.330(5)                                                      |
| γ/°                                         | 96.723(6)                                                      |
| Volume/Å <sup>3</sup>                       | 2235.8(3)                                                      |
| Z                                           | 2                                                              |
| ρ <sub>calc</sub> /cm <sup>3</sup>          | 1.127                                                          |
| μ/mm <sup>-1</sup>                          | 0.518                                                          |
| F(000)                                      | 828.0                                                          |
| Crystal size/mm <sup>3</sup>                | 0.07 × 0.06 × 0.04                                             |
| Radiation                                   | CuKα (λ = 1.54178)                                             |
| 2θ range for data collection/°              | 4.452 to 137.738                                               |
| Index ranges                                | -11 ≤ h ≤ 11, -14 ≤ k ≤ 14, -23 ≤ l ≤ 24                       |
| Reflections collected                       | 24543                                                          |
| Independent reflections                     | 8111 [R <sub>int</sub> = 0.0650, R <sub>sigma</sub> = 0.0565]  |
| Data/restraints/parameters                  | 8111/0/522                                                     |
| Goodness-of-fit on F <sup>2</sup>           | 1.041                                                          |
| Final R indexes [I ≥ 2σ (I)]                | R <sub>1</sub> = 0.1098, wR <sub>2</sub> = 0.2645              |
| Final R indexes [all data]                  | R <sub>1</sub> = 0.1600, wR <sub>2</sub> = 0.3108              |
| Largest diff. peak/hole / e Å <sup>-3</sup> | 0.48/-0.33                                                     |

**Table S4. Crystal data and structure refinement for 4.**

|                                             |                                                                                |
|---------------------------------------------|--------------------------------------------------------------------------------|
| Identification code                         | 4 / 2552627                                                                    |
| Empirical formula                           | C <sub>55</sub> H <sub>89</sub> Al <sub>2</sub> BN <sub>4</sub> O <sub>2</sub> |
| Formula weight                              | 903.07                                                                         |
| Temperature/K                               | 100.0                                                                          |
| Crystal system                              | monoclinic                                                                     |
| Space group                                 | P2 <sub>1</sub> /n                                                             |
| a/Å                                         | 13.1957(4)                                                                     |
| b/Å                                         | 21.9001(7)                                                                     |
| c/Å                                         | 21.6388(8)                                                                     |
| α/°                                         | 90                                                                             |
| β/°                                         | 103.7620(10)                                                                   |
| γ/°                                         | 90                                                                             |
| Volume/Å <sup>3</sup>                       | 6073.8(4)                                                                      |
| Z                                           | 4                                                                              |
| ρ <sub>calc</sub> /cm <sup>3</sup>          | 0.988                                                                          |
| μ/mm <sup>-1</sup>                          | 0.085                                                                          |
| F(000)                                      | 1976.0                                                                         |
| Crystal size/mm <sup>3</sup>                | 0.171 × 0.083 × 0.043                                                          |
| Radiation                                   | MoKα (λ = 0.71073)                                                             |
| 2θ range for data collection/°              | 4.096 to 54.984                                                                |
| Index ranges                                | -17 ≤ h ≤ 17, -28 ≤ k ≤ 28, -28 ≤ l ≤ 28                                       |
| Reflections collected                       | 166360                                                                         |
| Independent reflections                     | 13925 [R <sub>int</sub> = 0.0764, R <sub>sigma</sub> = 0.0298]                 |
| Data/restraints/parameters                  | 13925/0/630                                                                    |
| Goodness-of-fit on F <sup>2</sup>           | 1.138                                                                          |
| Final R indexes [I ≥ 2σ (I)]                | R <sub>1</sub> = 0.0570, wR <sub>2</sub> = 0.1279                              |
| Final R indexes [all data]                  | R <sub>1</sub> = 0.0663, wR <sub>2</sub> = 0.1320                              |
| Largest diff. peak/hole / e Å <sup>-3</sup> | 0.35/-0.30                                                                     |

**Table S5. Crystal data and structure refinement for 5.**

|                                             |                                                                                                              |
|---------------------------------------------|--------------------------------------------------------------------------------------------------------------|
| Identification code                         | 5 / 2552628                                                                                                  |
| Empirical formula                           | C <sub>51</sub> H <sub>71</sub> Ag <sub>2</sub> BF <sub>6</sub> N <sub>4</sub> O <sub>8</sub> S <sub>2</sub> |
| Formula weight                              | 1272.78                                                                                                      |
| Temperature/K                               | 100.0                                                                                                        |
| Crystal system                              | triclinic                                                                                                    |
| Space group                                 | P-1                                                                                                          |
| a/Å                                         | 13.1275(8)                                                                                                   |
| b/Å                                         | 21.4522(11)                                                                                                  |
| c/Å                                         | 22.9324(15)                                                                                                  |
| α/°                                         | 74.241(2)                                                                                                    |
| β/°                                         | 82.040(2)                                                                                                    |
| γ/°                                         | 88.240(2)                                                                                                    |
| Volume/Å <sup>3</sup>                       | 6155.3(6)                                                                                                    |
| Z                                           | 4                                                                                                            |
| ρ <sub>calc</sub> /cm <sup>3</sup>          | 1.373                                                                                                        |
| μ/mm <sup>-1</sup>                          | 0.771                                                                                                        |
| F(000)                                      | 2616.0                                                                                                       |
| Crystal size/mm <sup>3</sup>                | 0.178 × 0.016 × 0.015                                                                                        |
| Radiation                                   | MoKα (λ = 0.71073)                                                                                           |
| 2θ range for data collection/°              | 3.714 to 52.73                                                                                               |
| Index ranges                                | -16 ≤ h ≤ 16, -26 ≤ k ≤ 26, -28 ≤ l ≤ 28                                                                     |
| Reflections collected                       | 95710                                                                                                        |
| Independent reflections                     | 25059 [R <sub>int</sub> = 0.0636, R <sub>sigma</sub> = 0.0517]                                               |
| Data/restraints/parameters                  | 25059/12/1365                                                                                                |
| Goodness-of-fit on F <sup>2</sup>           | 1.129                                                                                                        |
| Final R indexes [I ≥ 2σ (I)]                | R <sub>1</sub> = 0.0798, wR <sub>2</sub> = 0.1508                                                            |
| Final R indexes [all data]                  | R <sub>1</sub> = 0.1113, wR <sub>2</sub> = 0.1718                                                            |
| Largest diff. peak/hole / e Å <sup>-3</sup> | 2.21/-1.36                                                                                                   |

## V. Fourier Transform Infrared Spectrum

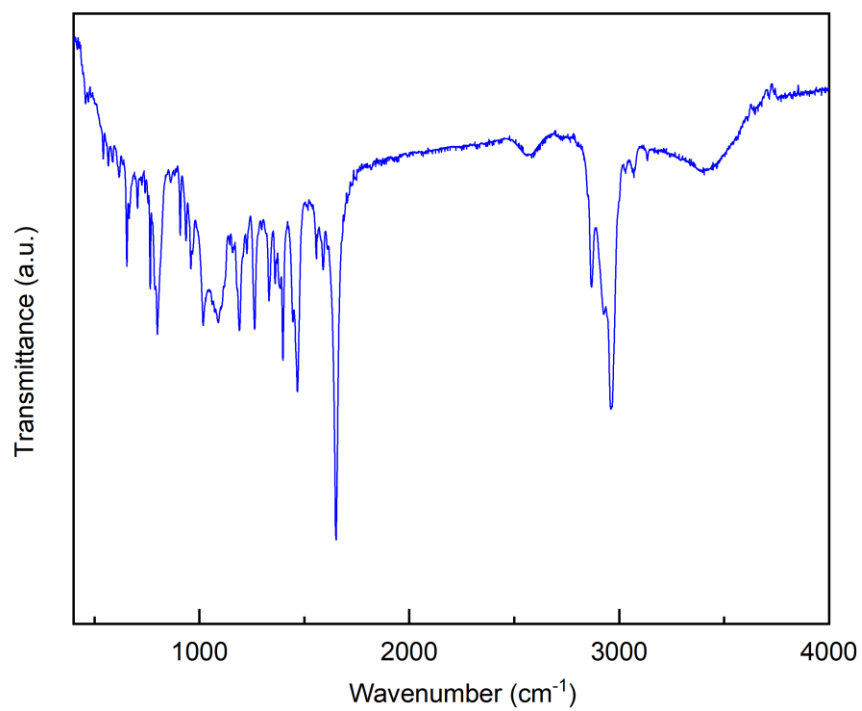

**Figure S20.** Fourier transform infrared spectroscopy spectrum of **3**.

## VI. Computational Details

Geometry optimizations were performed using the Gaussian 16 package with the M06-2X density functional. 错误!不能识别的开关参数。 The def2-SVP basis set was employed for all the atoms. Frequency calculations at the same level of theory were performed to identify the number of imaginary frequencies (zero for local minimum and one for transition states) and provide the thermal corrections of Gibbs free energy and electron energy. Natural bond orbital (NBO) calculations were carried out using NBO 7.0 program at the M06-2X/def2-SVP level of theory. 错误!不能识别的开关参数。 Intrinsic bond orbital (IBOs) computations at B3LYP-D3/def2-TZVP/def2-J level of theory were performed with ORCA programs and visualized by IBOView program. 错误!不能识别的开关参数。 The minimum energy crossing point (MECP) calculations were performed based on Gaussian 16 program at the M06-2X/def2-SVP level of theory from Tian Lu, sobMECP program method. 错误!不能识别的开关参数。 The AIM and ETS-NOCV analyses were carried out using the free software Multiwfn. 错误!不能识别的开关参数。

| Compounds                 | Equations | $\Delta H$ |
|---------------------------|-----------|------------|
| $\text{BO}_2\text{H}_2^-$ |           | -28.98     |
| $\text{CO}_2\text{H}_2$   |           | -31.80     |
| $\text{C}_3\text{H}_6$    |           | -26.58     |
| $\text{SiO}_2\text{H}_2$  |           | -67.57     |
| $\text{PO}_2\text{H}_2^+$ |           | -61.95     |

**Figure S21.** Ring strain energies calculated for simplified  $\text{BO}_2\text{H}_2^-$ ,  $\text{CO}_2\text{H}_2$ ,  $\text{C}_3\text{H}_6$ ,  $\text{SiO}_2\text{H}_2$  and  $\text{PO}_2\text{H}_2^+$ , which based on the designed isodesmotic equations. The relative enthalpy changes are given in kcal/mol.

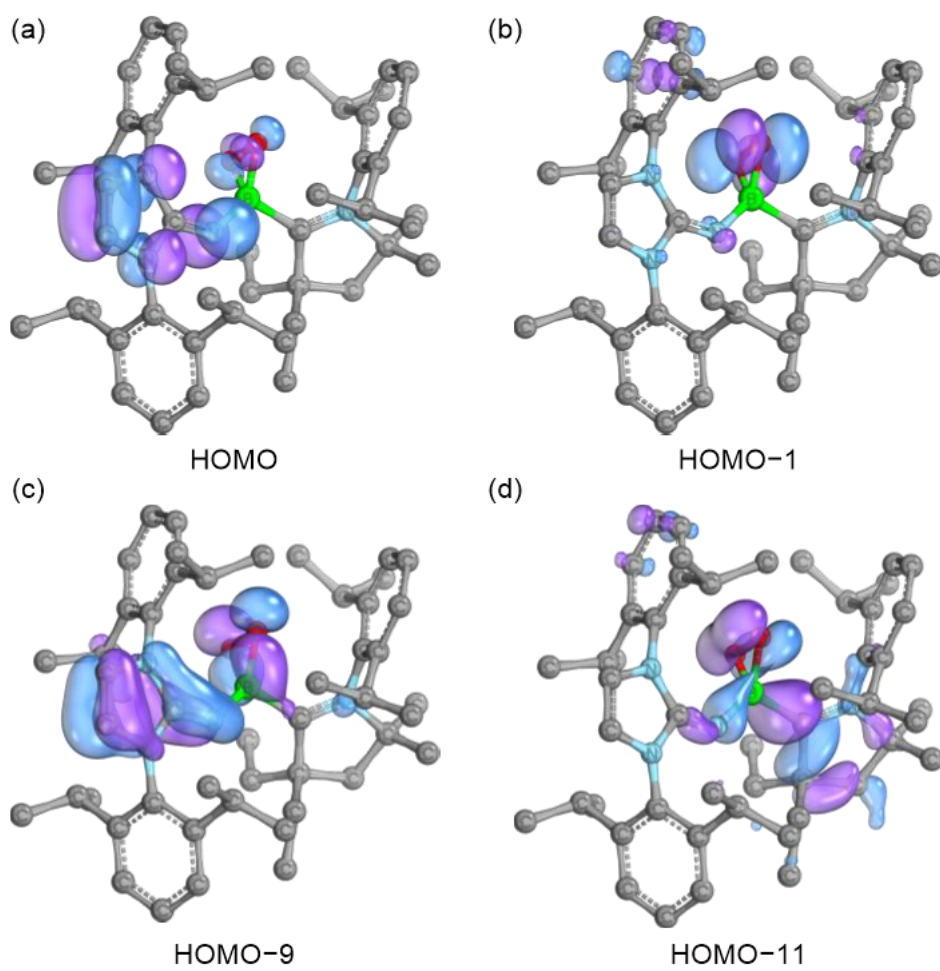

**Figure S22.** Molecule orbitals of **3**: (a) HOMO orbital. (b) HOMO-1 orbital. (c) HOMO-9 orbital. (d) HOMO-11 orbital.

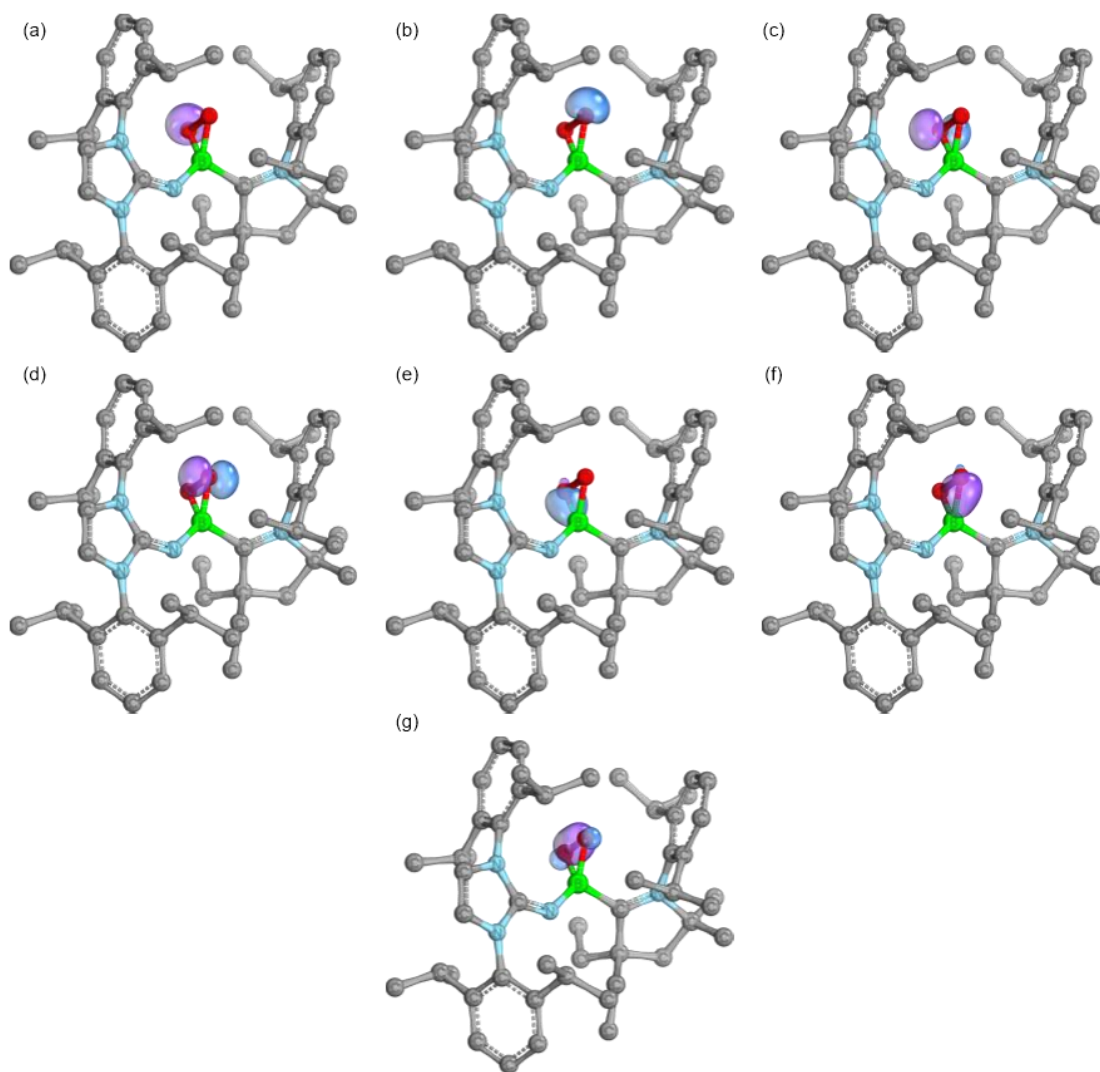

**Figure S23.** Depiction of selected IBOs of **3**. (a) lone-pair orbital at O1 atom in the B1–O1–O2 plane. (b) lone-pair orbital at O2 atom in the B1–O1–O2 plane. (c) lone-pair orbital at O1 atom out of the B1–O1–O2 plane. (d) lone-pair orbital at O2 atom out of the B1–O1–O2 plane. (e) B1–O2  $\sigma$ -bonding orbital. (f) B1–O1  $\sigma$ -bonding orbital. (g) O1–O2  $\sigma$ -bonding orbital.

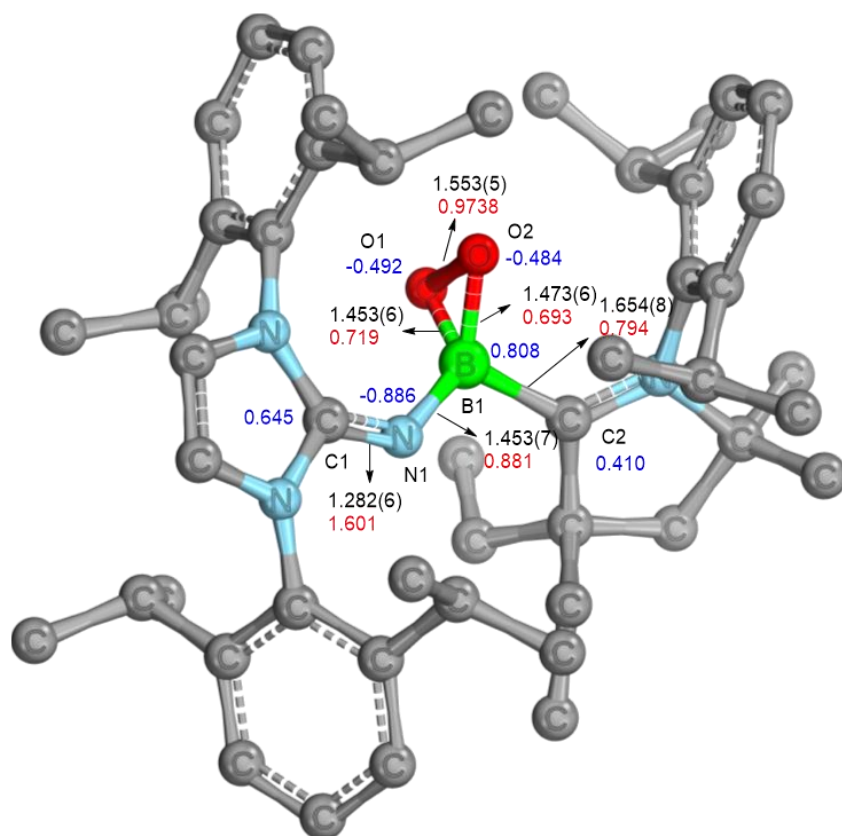

**Figure S24.** The NBO calculation of **3**. All hydrogens are omitted for clarity. Red: WBIs. Black: crystal bond lengths. Blue: natural charges.

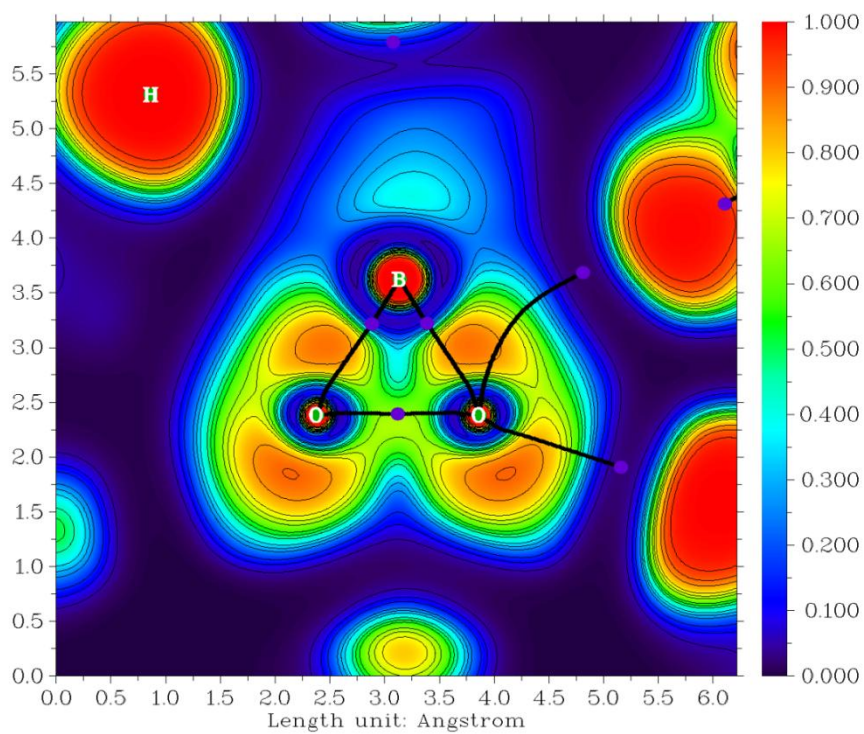

**Figure S25.** ELF plot of **3** in the B(1)–O(1)–O<sub>2</sub> plane.

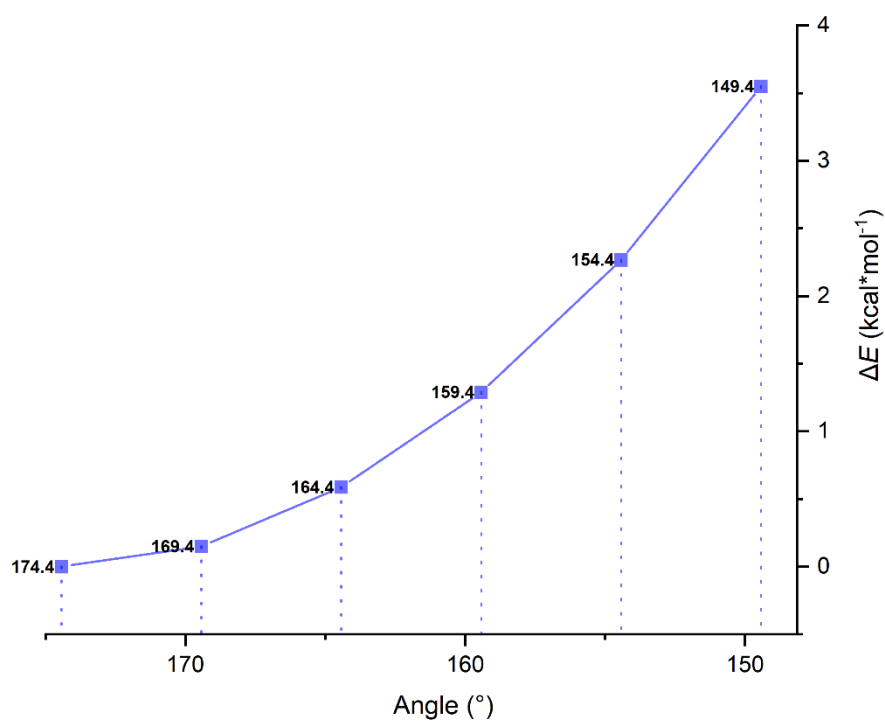

**Figure S26.** The relationship between N1-B1-C2 angles ( $^{\circ}$ ) and relative single-point energy  $\Delta E$  (kcal/mol) of **2**.

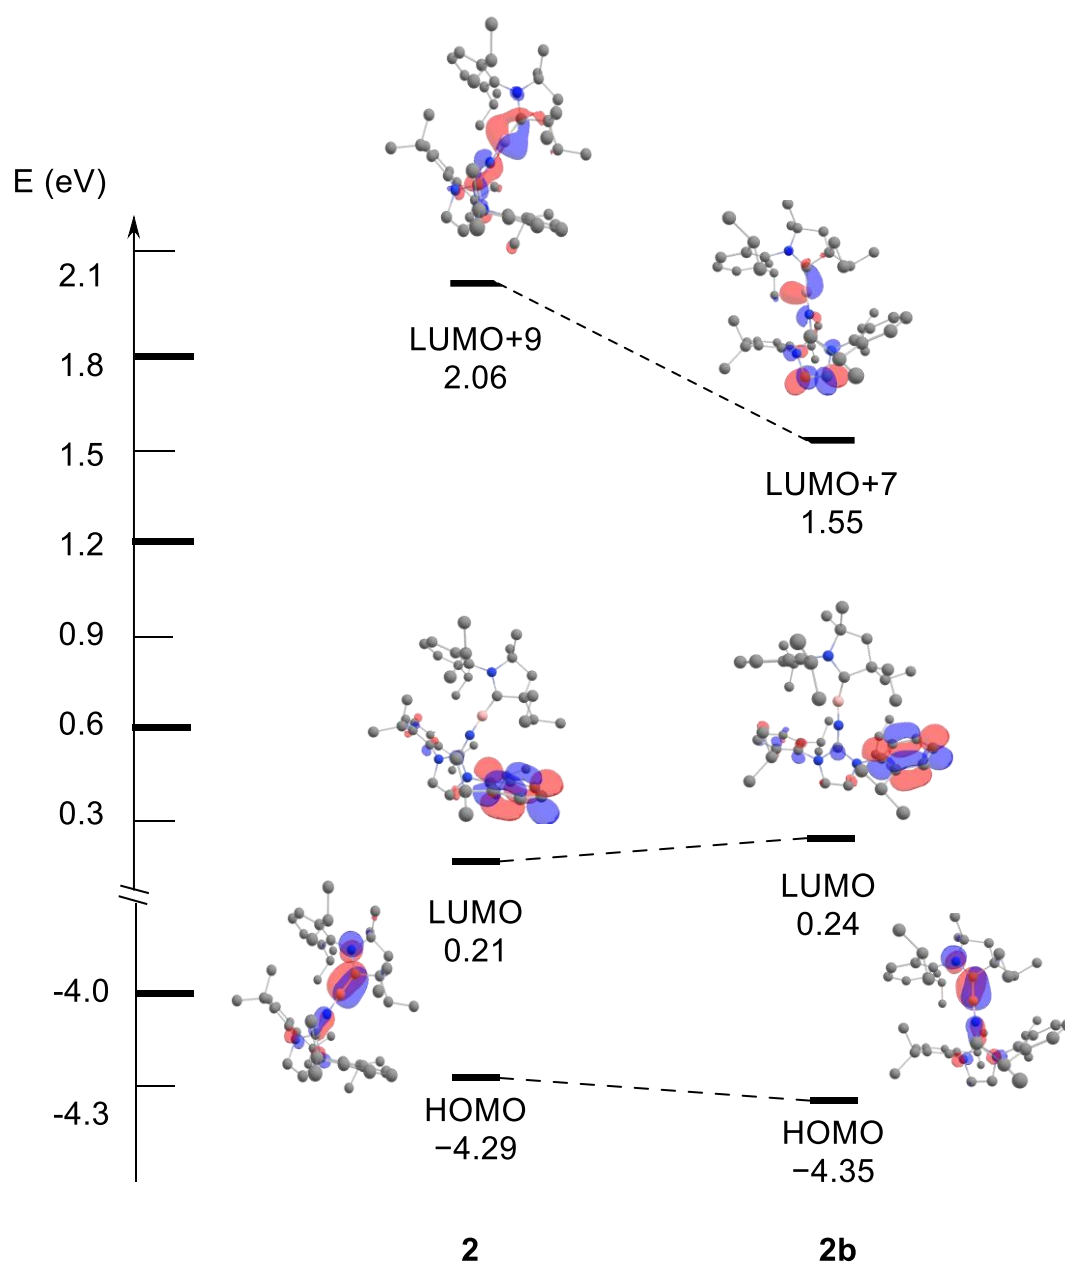

**Figure S27.** The molecule orbitals of **2** and **2b**.

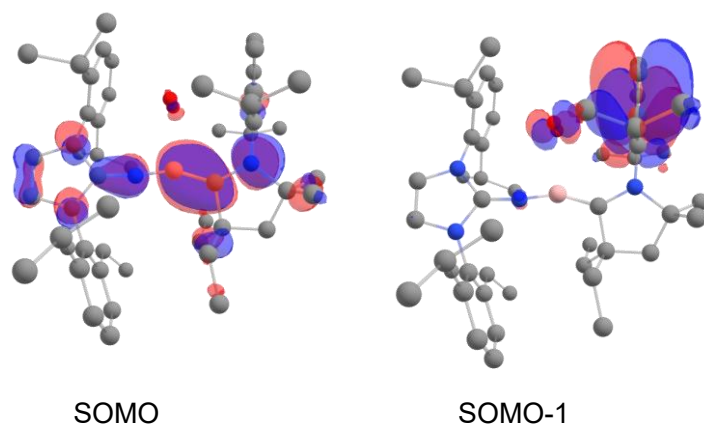

**Figure S28.** Calculated frontier molecular orbitals of  $^3\text{TS1}$ .

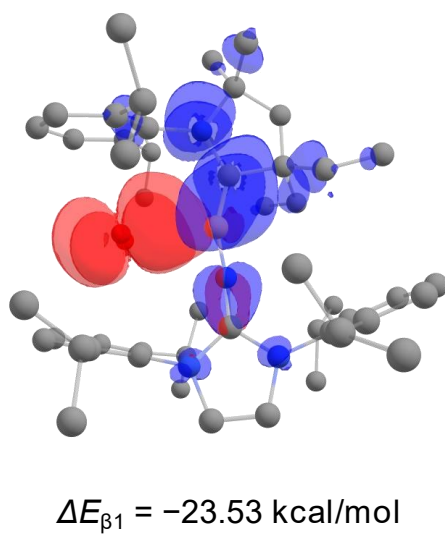

**Figure S29.** Plot of deformation density of the orbital interaction between borylene **2** and  $^3\text{O}_2$  in  $^3\text{TS1}$  with the corresponding interaction energy.

## VII. Calculated Cartesian Coordinates

2

|   |             |             |             |
|---|-------------|-------------|-------------|
| N | 2.75371500  | -1.44449000 | 0.00557500  |
| N | -0.74869200 | 0.21075100  | 0.01663500  |
| N | -2.31336800 | 1.98926900  | 0.32631900  |
| O | 1.52570800  | 2.44603800  | 0.28088400  |
| N | -3.10258500 | -0.07125000 | 0.31011300  |
| O | 1.51998300  | 2.50890600  | -0.90119300 |
| C | -1.92401500 | 0.65928000  | 0.20329300  |
| C | 1.34943200  | -1.57380600 | -0.10148400 |
| C | 3.38097600  | -0.19332900 | 0.24434000  |
| C | -1.54262900 | 3.10330000  | -0.13479500 |
| C | -0.92677100 | 3.94985700  | 0.80313600  |
| C | 3.38390700  | 0.40750200  | 1.52661300  |
| C | 3.42617700  | -2.73854000 | 0.21253900  |
| C | -3.22005400 | -1.49435100 | 0.26680000  |
| C | 3.99385400  | 0.47244200  | -0.84604100 |
| C | 1.03443200  | -3.04144200 | -0.43625300 |
| C | -3.35035300 | -2.18872200 | 1.48352000  |
| C | -0.97418300 | 3.63436900  | 2.28856500  |
| H | -0.99750000 | 2.53604900  | 2.37759300  |
| C | -1.46032400 | 3.32708700  | -1.52053100 |
| C | 4.07286400  | 1.61273400  | 1.70765400  |
| H | 4.08909100  | 2.07364200  | 2.69831700  |
| C | -0.17013600 | 5.32586600  | -1.04709900 |
| H | 0.37085400  | 6.20292200  | -1.40574700 |
| C | 4.65896800  | 1.68155400  | -0.62121800 |
| H | 5.13608900  | 2.19402900  | -1.45979100 |
| C | -3.69608800 | 2.05469700  | 0.50431800  |
| H | -4.20651200 | 3.00829100  | 0.58709000  |
| C | 4.71672500  | 2.24323800  | 0.64969000  |
| H | 5.24865400  | 3.18245400  | 0.81164300  |
| C | -0.25168700 | 5.07398900  | 0.31931600  |

|   |             |             |             |
|---|-------------|-------------|-------------|
| H | 0.23875100  | 5.75121200  | 1.01883200  |
| C | -3.24431800 | -2.14463800 | -0.98369400 |
| C | -3.53465600 | -3.57351500 | 1.42854200  |
| H | -3.64254200 | -4.14248000 | 2.35238400  |
| C | 2.43603400  | -3.70289800 | -0.46467500 |
| H | 2.43896100  | -4.68529300 | 0.02951400  |
| H | 2.75216300  | -3.86663700 | -1.50515400 |
| C | -4.17534500 | 0.79635300  | 0.51308400  |
| H | -5.18552800 | 0.41944500  | 0.63770800  |
| C | -0.75653100 | 4.45362900  | -1.95742800 |
| H | -0.66479100 | 4.64797300  | -3.02761500 |
| C | 3.90749500  | -0.07097500 | -2.26264400 |
| H | 3.45901400  | -1.06974000 | -2.19181100 |
| C | 3.61306900  | -3.10383100 | 1.69357900  |
| H | 4.26473900  | -2.37178500 | 2.19012900  |
| H | 4.08575900  | -4.09391200 | 1.77912900  |
| H | 2.65264100  | -3.13819200 | 2.22602200  |
| C | 0.11596700  | -3.65331200 | 0.64559500  |
| H | 0.60339800  | -3.52117700 | 1.62481800  |
| H | -0.80305500 | -3.04227100 | 0.68519900  |
| C | 2.60902300  | -0.16389700 | 2.70426200  |
| H | 2.18570600  | -1.12407400 | 2.38926400  |
| C | 4.80021900  | -2.76992200 | -0.45757300 |
| H | 4.71955900  | -2.62066100 | -1.54253500 |
| H | 5.27841700  | -3.74440200 | -0.28046500 |
| H | 5.45656500  | -1.98817900 | -0.04431300 |
| C | -2.06358700 | 2.36695100  | -2.53248500 |
| H | -2.73122200 | 1.67581400  | -1.99568000 |
| C | -3.20768300 | -1.46230300 | 2.81060000  |
| H | -3.61623100 | -0.44802200 | 2.68431000  |
| C | -3.56933700 | -4.23685500 | 0.20683900  |
| H | -3.70452300 | -5.31943500 | 0.18112800  |
| B | 0.30991400  | -0.60163900 | -0.01726000 |
| C | -3.41412600 | -3.53275000 | -0.98410400 |

|   |             |             |             |
|---|-------------|-------------|-------------|
| H | -3.42587700 | -4.07535200 | -1.92921600 |
| C | -2.24750200 | 4.19099300  | 2.93718800  |
| H | -2.28845400 | 5.28480700  | 2.81907500  |
| H | -2.26213500 | 3.96185100  | 4.01300900  |
| H | -3.15486200 | 3.76416600  | 2.48987900  |
| C | 2.96500700  | 0.78166400  | -3.11837500 |
| H | 3.33055300  | 1.81806600  | -3.20185200 |
| H | 1.96052300  | 0.81342700  | -2.67521500 |
| H | 2.88438500  | 0.36225700  | -4.13339800 |
| C | 0.33661700  | -3.17183900 | -1.80784500 |
| H | 0.23110300  | -4.24315400 | -2.05433200 |
| H | -0.68656000 | -2.78129200 | -1.67717500 |
| C | 5.28184000  | -0.19115700 | -2.92627100 |
| H | 5.19308300  | -0.69294400 | -3.90175100 |
| H | 5.98230800  | -0.76653400 | -2.30429500 |
| H | 5.72807800  | 0.79909600  | -3.10638000 |
| C | -0.27022300 | -5.11796100 | 0.45509900  |
| H | -0.87044900 | -5.46834800 | 1.30789900  |
| H | 0.61207800  | -5.77213100 | 0.38071800  |
| H | -0.87748400 | -5.26525000 | -0.44930300 |
| C | -0.96115300 | 1.52900400  | -3.19279000 |
| H | -1.39687200 | 0.81818300  | -3.91285900 |
| H | -0.39474400 | 0.96035300  | -2.43997400 |
| H | -0.25481300 | 2.17516900  | -3.73766900 |
| C | 0.26067200  | 4.14057500  | 3.03517900  |
| H | 1.18768300  | 3.84196900  | 2.52530500  |
| H | 0.27668600  | 3.72774400  | 4.05412100  |
| H | 0.25241500  | 5.23751600  | 3.12768200  |
| C | 1.43016700  | 0.74862100  | 3.06245600  |
| H | 0.84057900  | 0.30800600  | 3.88142200  |
| H | 0.76626600  | 0.89543000  | 2.19799700  |
| H | 1.78851600  | 1.73508200  | 3.39529000  |
| C | -3.09727900 | -1.35870700 | -2.28091300 |
| H | -2.25354300 | -0.66169600 | -2.13248400 |

|   |             |             |             |
|---|-------------|-------------|-------------|
| C | -3.97450900 | -2.12761400 | 3.95277800  |
| H | -3.52373100 | -3.09091500 | 4.23447900  |
| H | -5.02716300 | -2.30517000 | 3.68885700  |
| H | -3.94645500 | -1.48554000 | 4.84448900  |
| C | -1.72028400 | -1.32272800 | 3.16487500  |
| H | -1.59965700 | -0.74013800 | 4.09074300  |
| H | -1.14775500 | -0.83108600 | 2.36409400  |
| H | -1.27488100 | -2.31772300 | 3.32251200  |
| C | -2.91529900 | 3.09228400  | -3.57722000 |
| H | -2.30369700 | 3.75366800  | -4.20887600 |
| H | -3.69738800 | 3.70189700  | -3.10217600 |
| H | -3.40210700 | 2.36356500  | -4.24185400 |
| C | 3.48850800  | -0.37833500 | 3.94071300  |
| H | 3.81770200  | 0.58360700  | 4.36296200  |
| H | 4.38903600  | -0.96542300 | 3.71483500  |
| H | 2.92295800  | -0.90406600 | 4.72484400  |
| C | -4.35688800 | -0.53828300 | -2.59632400 |
| H | -5.21813400 | -1.20970600 | -2.73582800 |
| H | -4.21166700 | 0.02437300  | -3.53132100 |
| H | -4.60762500 | 0.18290600  | -1.80902400 |
| C | 1.00333400  | -2.45159800 | -2.97352200 |
| H | 1.08530800  | -1.37526300 | -2.76654300 |
| H | 0.42077300  | -2.58305500 | -3.89772600 |
| H | 2.01570100  | -2.83581600 | -3.17330000 |
| C | -2.77708100 | -2.23248500 | -3.49472300 |
| H | -1.92210000 | -2.89862100 | -3.32291200 |
| H | -2.53989200 | -1.59187400 | -4.35623600 |
| H | -3.64422000 | -2.85011400 | -3.77560500 |

**<sup>3</sup>TS1**

|   |             |             |             |
|---|-------------|-------------|-------------|
| N | 2.62218500  | -1.62388500 | -0.12741100 |
| N | -0.89203500 | 0.18797700  | -0.01506200 |
| N | -2.11729700 | 2.20241700  | 0.39352800  |
| O | 1.50196200  | 1.59768500  | 0.67767100  |

|   |             |             |             |
|---|-------------|-------------|-------------|
| N | -3.22943000 | 0.30224200  | 0.38798800  |
| O | 1.59891500  | 1.80328800  | -0.51738300 |
| C | -1.95873000 | 0.83405000  | 0.23338900  |
| C | 1.24681800  | -1.47389300 | -0.23863100 |
| C | 3.47623300  | -0.52085200 | 0.15421300  |
| C | -1.15290600 | 3.16563800  | -0.04301300 |
| C | -0.34207200 | 3.80825600  | 0.90812500  |
| C | 3.66933300  | -0.08292400 | 1.48379200  |
| C | 3.07465900  | -3.03082100 | -0.20059700 |
| C | -3.53019900 | -1.09316200 | 0.35813900  |
| C | 4.04417200  | 0.19145600  | -0.92677400 |
| C | 0.63607100  | -2.82950300 | -0.64650900 |
| C | -3.63686100 | -1.77943100 | 1.58049700  |
| C | -0.43179400 | 3.44211200  | 2.38012400  |
| H | -0.66808100 | 2.36542500  | 2.41839600  |
| C | -1.04101100 | 3.40719000  | -1.42221500 |
| C | 4.47417600  | 1.03894300  | 1.70889800  |
| H | 4.63125400  | 1.38611900  | 2.73291300  |
| C | 0.69284200  | 5.02354900  | -0.91840600 |
| H | 1.42608300  | 5.75459100  | -1.26265700 |
| C | 4.83725000  | 1.30938700  | -0.65194900 |
| H | 5.27854700  | 1.86826500  | -1.48032600 |
| C | -3.45936900 | 2.49003900  | 0.63510500  |
| H | -3.80286800 | 3.51226200  | 0.75278100  |
| C | 5.05799000  | 1.73057400  | 0.65426000  |
| H | 5.67687400  | 2.60793400  | 0.85001400  |
| C | 0.57274400  | 4.75458900  | 0.44232900  |
| H | 1.22652300  | 5.26625500  | 1.14858200  |
| C | -3.69547100 | -1.72842300 | -0.88855600 |
| C | -3.95121600 | -3.14158200 | 1.53664800  |
| H | -4.04468300 | -3.70540100 | 2.46548500  |
| C | 1.89038700  | -3.69083600 | -0.92334500 |
| H | 1.75979700  | -4.73528000 | -0.60810700 |
| H | 2.09869700  | -3.70365100 | -2.00254000 |

|   |             |             |             |
|---|-------------|-------------|-------------|
| C | -4.13833800 | 1.32459800  | 0.65103400  |
| H | -5.18965800 | 1.11458700  | 0.81979900  |
| C | -0.09823700 | 4.35007300  | -1.84185400 |
| H | 0.02269000  | 4.55246000  | -2.90787400 |
| C | 3.79770900  | -0.18944000 | -2.37903700 |
| H | 3.19407000  | -1.10684000 | -2.37879100 |
| C | 3.29378400  | -3.66107300 | 1.18339100  |
| H | 4.09547300  | -3.14136100 | 1.72455400  |
| H | 3.59070100  | -4.71363000 | 1.06416400  |
| H | 2.38192700  | -3.63219100 | 1.79422400  |
| C | -0.24266400 | -3.38371200 | 0.50229300  |
| H | 0.33359300  | -3.33665400 | 1.43997300  |
| H | -1.08354700 | -2.68093800 | 0.63554400  |
| C | 3.00535800  | -0.74821400 | 2.68009400  |
| H | 2.42027400  | -1.59542500 | 2.30428800  |
| C | 4.37688500  | -3.17163100 | -0.98830200 |
| H | 4.25554800  | -2.85492500 | -2.03165400 |
| H | 4.69319200  | -4.22473500 | -0.98669300 |
| H | 5.17928900  | -2.57333100 | -0.53000700 |
| C | -1.86167700 | 2.64101300  | -2.44714300 |
| H | -2.64000200 | 2.07322900  | -1.91351700 |
| C | -3.32783500 | -1.08290400 | 2.89564300  |
| H | -3.59614900 | -0.02124400 | 2.78495300  |
| C | -4.13308000 | -3.78909200 | 0.31972400  |
| H | -4.36936000 | -4.85443300 | 0.30235000  |
| B | 0.30639600  | -0.38632900 | -0.03490500 |
| C | -3.99691000 | -3.09351200 | -0.87919100 |
| H | -4.12449600 | -3.62636600 | -1.82121400 |
| C | -1.56265600 | 4.20669900  | 3.07894700  |
| H | -1.38235500 | 5.29104800  | 3.01796200  |
| H | -1.61595500 | 3.92828400  | 4.14196000  |
| H | -2.54132000 | 3.99798300  | 2.62667200  |
| C | 2.98757100  | 0.87694400  | -3.12506400 |
| H | 3.50688500  | 1.84831100  | -3.11778900 |

|   |             |             |             |
|---|-------------|-------------|-------------|
| H | 2.00282300  | 1.01727800  | -2.66311500 |
| H | 2.84532500  | 0.57437200  | -4.17437200 |
| C | -0.23916100 | -2.69095500 | -1.91167200 |
| H | -0.60130300 | -3.69310300 | -2.20043700 |
| H | -1.12999100 | -2.11218300 | -1.61836800 |
| C | 5.11336300  | -0.46405600 | -3.11666300 |
| H | 4.91403800  | -0.86007200 | -4.12407000 |
| H | 5.74185600  | -1.18661600 | -2.57770000 |
| H | 5.69706800  | 0.46174100  | -3.23603400 |
| C | -0.79951200 | -4.79280400 | 0.31542000  |
| H | -1.41243000 | -5.07313700 | 1.18464900  |
| H | -0.00383600 | -5.54654600 | 0.21795600  |
| H | -1.44736100 | -4.86361200 | -0.57000200 |
| C | -0.97525500 | 1.63037200  | -3.18538000 |
| H | -1.57546400 | 1.02779600  | -3.88581700 |
| H | -0.47818300 | 0.95372000  | -2.47411100 |
| H | -0.19458300 | 2.14777100  | -3.76494500 |
| C | 0.88652000  | 3.65439500  | 3.12422200  |
| H | 1.72160400  | 3.18349700  | 2.58691800  |
| H | 0.82279600  | 3.21026500  | 4.12834700  |
| H | 1.10598100  | 4.72551000  | 3.25443400  |
| C | 2.02428200  | 0.18762100  | 3.39616500  |
| H | 1.57282300  | -0.33224000 | 4.25555600  |
| H | 1.21938400  | 0.51044600  | 2.72287700  |
| H | 2.53771600  | 1.08361800  | 3.77841100  |
| C | -3.53677900 | -0.95118000 | -2.18945700 |
| H | -2.62213400 | -0.34181500 | -2.08062000 |
| C | -4.12571200 | -1.63799600 | 4.07535700  |
| H | -3.80307000 | -2.65642800 | 4.33842700  |
| H | -5.20401500 | -1.66416600 | 3.86153700  |
| H | -3.96523100 | -1.00984000 | 4.96299800  |
| C | -1.81974400 | -1.15341400 | 3.17827100  |
| H | -1.57338400 | -0.59904600 | 4.09637700  |
| H | -1.22532800 | -0.73999600 | 2.34993500  |

|   |             |             |             |
|---|-------------|-------------|-------------|
| H | -1.51024900 | -2.20180000 | 3.31545700  |
| C | -2.57973500 | 3.57469900  | -3.42457400 |
| H | -1.86408300 | 4.13929100  | -4.04073600 |
| H | -3.21463900 | 4.29776700  | -2.89267200 |
| H | -3.21622600 | 2.99319200  | -4.10791200 |
| C | 4.04714200  | -1.26193500 | 3.68212800  |
| H | 4.55137200  | -0.42108900 | 4.18314000  |
| H | 4.82573700  | -1.86881200 | 3.19943900  |
| H | 3.56591600  | -1.87117200 | 4.46219300  |
| C | -4.71794700 | -0.00361800 | -2.44177200 |
| H | -5.65126100 | -0.57890000 | -2.54171500 |
| H | -4.55910100 | 0.55106800  | -3.37926600 |
| H | -4.85085900 | 0.73156800  | -1.63855900 |
| C | 0.41301500  | -2.02230600 | -3.11758600 |
| H | 0.81218400  | -1.03390400 | -2.84800600 |
| H | -0.32308100 | -1.88235300 | -3.92339800 |
| H | 1.23796000  | -2.61900300 | -3.53538200 |
| C | -3.35440700 | -1.84950600 | -3.41300500 |
| H | -2.55709500 | -2.59096100 | -3.26981700 |
| H | -3.09625000 | -1.23476300 | -4.28738600 |
| H | -4.28549200 | -2.38562000 | -3.65380100 |

**<sup>3</sup>INT1**

|   |             |             |             |
|---|-------------|-------------|-------------|
| N | 2.50612600  | -1.64521700 | -0.35095000 |
| N | -0.97166800 | 0.00650000  | -0.11637400 |
| N | -1.90245600 | 2.14852600  | 0.62670300  |
| O | 1.15092200  | 0.86331300  | 0.82054000  |
| N | -3.15987900 | 0.35675200  | 0.65800700  |
| O | 1.78225300  | 1.75725000  | 0.10890500  |
| C | -1.87929200 | 0.78904100  | 0.34779600  |
| C | 1.16896600  | -1.37651800 | -0.47533700 |
| C | 3.47045400  | -0.65834400 | 0.03813200  |
| C | -0.95349600 | 3.11216800  | 0.15460700  |
| C | -0.03808000 | 3.67927000  | 1.05584900  |

|   |             |             |             |
|---|-------------|-------------|-------------|
| C | 3.80836200  | -0.47959700 | 1.39590900  |
| C | 2.88720500  | -3.03629600 | -0.72209800 |
| C | -3.57981200 | -1.00389100 | 0.53866500  |
| C | 4.01194200  | 0.18033400  | -0.96148800 |
| C | 0.47520300  | -2.59183900 | -1.09366400 |
| C | -3.61743500 | -1.79840000 | 1.69639400  |
| C | 0.02676100  | 3.22741700  | 2.50433600  |
| H | -0.37617500 | 2.20335700  | 2.53649700  |
| C | -1.01476300 | 3.48403600  | -1.19991800 |
| C | 4.72997400  | 0.51954400  | 1.72567400  |
| H | 4.99842500  | 0.67119500  | 2.77351800  |
| C | 0.80239800  | 5.03181500  | -0.77373100 |
| H | 1.50203700  | 5.78429800  | -1.14110000 |
| C | 4.92770400  | 1.16457500  | -0.58056600 |
| H | 5.34939700  | 1.82381700  | -1.34217000 |
| C | -3.16151600 | 2.51760200  | 1.09332300  |
| H | -3.39025500 | 3.55057800  | 1.33333900  |
| C | 5.29181100  | 1.33349500  | 0.74994400  |
| H | 6.00405800  | 2.11173500  | 1.02884800  |
| C | 0.82717700  | 4.66018000  | 0.56634700  |
| H | 1.55748100  | 5.11389300  | 1.23699900  |
| C | -3.91344500 | -1.50118100 | -0.73662800 |
| C | -4.03983700 | -3.12557100 | 1.56160500  |
| H | -4.08602200 | -3.77006700 | 2.44005700  |
| C | 1.66308500  | -3.47451900 | -1.53827900 |
| H | 1.46306200  | -4.54776900 | -1.41579600 |
| H | 1.87082100  | -3.30452900 | -2.60470500 |
| C | -3.93277800 | 1.40998900  | 1.12598700  |
| H | -4.96393000 | 1.26738000  | 1.43333200  |
| C | -0.10399400 | 4.44348000  | -1.65015300 |
| H | -0.11090200 | 4.74015500  | -2.70081500 |
| C | 3.60424300  | 0.09555900  | -2.42574800 |
| H | 2.95433600  | -0.78206200 | -2.54381700 |
| C | 3.08084500  | -3.92160700 | 0.51539500  |

|   |             |             |             |
|---|-------------|-------------|-------------|
| H | 3.92888200  | -3.57174500 | 1.11766300  |
| H | 3.29557100  | -4.95074500 | 0.19250800  |
| H | 2.18401700  | -3.94179700 | 1.14786500  |
| C | -0.41022200 | -3.26784800 | -0.01301500 |
| H | 0.19704500  | -3.42984900 | 0.89225600  |
| H | -1.18448400 | -2.53608200 | 0.26814200  |
| C | 3.18379800  | -1.28622100 | 2.52460400  |
| H | 2.47832100  | -1.99733000 | 2.07569700  |
| C | 4.17442600  | -3.08435900 | -1.54311400 |
| H | 4.06929100  | -2.54852300 | -2.49416700 |
| H | 4.41311500  | -4.13333900 | -1.77026500 |
| H | 5.01977000  | -2.65323000 | -0.98607500 |
| C | -2.01545300 | 2.86646100  | -2.16406700 |
| H | -2.75655100 | 2.30250800  | -1.57595700 |
| C | -3.12449900 | -1.25931800 | 3.02955600  |
| H | -3.33615400 | -0.17968100 | 3.05531300  |
| C | -4.38946900 | -3.63664000 | 0.31711000  |
| H | -4.70889100 | -4.67637200 | 0.22753700  |
| B | 0.42253900  | -0.13091000 | 0.00841100  |
| C | -4.31746700 | -2.83616000 | -0.82065400 |
| H | -4.57723800 | -3.26286300 | -1.78930000 |
| C | -0.84715700 | 4.11868600  | 3.39515300  |
| H | -0.49615900 | 5.16154400  | 3.35491200  |
| H | -0.80011600 | 3.78249300  | 4.44168300  |
| H | -1.90036100 | 4.10436900  | 3.08132600  |
| C | 2.78650500  | 1.31932600  | -2.85819400 |
| H | 3.37835100  | 2.24229900  | -2.75116100 |
| H | 1.88447500  | 1.43639200  | -2.24356600 |
| H | 2.49461400  | 1.22119800  | -3.91559800 |
| C | -0.41926700 | -2.22404200 | -2.29667700 |
| H | -0.79503000 | -3.16248500 | -2.73934900 |
| H | -1.28874100 | -1.68320000 | -1.89519900 |
| C | 4.82034900  | -0.07532200 | -3.34370000 |
| H | 4.49453000  | -0.26982900 | -4.37666700 |

|   |             |             |             |
|---|-------------|-------------|-------------|
| H | 5.46636600  | -0.90378800 | -3.02057800 |
| H | 5.43376700  | 0.83827000  | -3.35989000 |
| C | -1.08027100 | -4.57874800 | -0.41597700 |
| H | -1.65790300 | -4.97992500 | 0.42944400  |
| H | -0.35353000 | -5.34972900 | -0.71426100 |
| H | -1.78725300 | -4.43624300 | -1.24586800 |
| C | -1.31937200 | 1.87293500  | -3.09891100 |
| H | -2.04934500 | 1.40084400  | -3.77595800 |
| H | -0.82201300 | 1.08312000  | -2.51875100 |
| H | -0.55993300 | 2.38023900  | -3.71476600 |
| C | 1.46094600  | 3.17374100  | 3.03557200  |
| H | 2.11261200  | 2.61621100  | 2.34795600  |
| H | 1.47479400  | 2.68024600  | 4.01857300  |
| H | 1.87544300  | 4.18448900  | 3.17423000  |
| C | 2.38401900  | -0.40097400 | 3.48866700  |
| H | 1.92058800  | -1.02184000 | 4.27080600  |
| H | 1.60009700  | 0.15541600  | 2.96028400  |
| H | 3.04096700  | 0.32911400  | 3.98732800  |
| C | -3.83095700 | -0.61066700 | -1.96859700 |
| H | -2.88013700 | -0.05793900 | -1.88924000 |
| C | -3.82105500 | -1.89246600 | 4.23376600  |
| H | -3.53447200 | -2.94747600 | 4.35785200  |
| H | -4.91585300 | -1.84286700 | 4.14351700  |
| H | -3.52660600 | -1.36807400 | 5.15387900  |
| C | -1.60194900 | -1.43460100 | 3.12963100  |
| H | -1.22276200 | -0.99459000 | 4.06407400  |
| H | -1.08102300 | -0.96457800 | 2.28249600  |
| H | -1.34498200 | -2.50582900 | 3.12215600  |
| C | -2.78532600 | 3.93015500  | -2.95087300 |
| H | -2.12188100 | 4.49167200  | -3.62548900 |
| H | -3.27376400 | 4.64942900  | -2.27788900 |
| H | -3.56039200 | 3.45596100  | -3.57106100 |
| C | 4.24734600  | -2.06452400 | 3.31023500  |
| H | 4.88009100  | -1.37400200 | 3.88884900  |

|   |             |             |             |
|---|-------------|-------------|-------------|
| H | 4.91262600  | -2.64430300 | 2.65554400  |
| H | 3.77306200  | -2.75525300 | 4.02364500  |
| C | -4.97924000 | 0.40664800  | -2.01375200 |
| H | -5.94706800 | -0.11302700 | -2.08707000 |
| H | -4.87326700 | 1.05491100  | -2.89738400 |
| H | -5.00238000 | 1.05270400  | -1.12655100 |
| C | 0.23359000  | -1.38487400 | -3.38964200 |
| H | 0.66093800  | -0.46005300 | -2.97767200 |
| H | -0.50992000 | -1.10061300 | -4.14949700 |
| H | 1.03988500  | -1.92303300 | -3.91174300 |
| C | -3.79749700 | -1.39353300 | -3.28098200 |
| H | -3.02056100 | -2.17045800 | -3.27660700 |
| H | -3.58962100 | -0.70777000 | -4.11522000 |
| H | -4.76689100 | -1.87323300 | -3.48718900 |

**<sup>3</sup>INT2**

|   |             |             |             |
|---|-------------|-------------|-------------|
| N | 2.65133300  | -1.14840600 | -0.83649200 |
| N | -0.98936500 | 0.02409000  | -0.28218900 |
| N | -2.06696100 | 1.78274000  | 0.98948600  |
| O | 0.99526300  | 0.39368300  | 1.14658700  |
| N | -2.90252700 | -0.23492800 | 1.07782000  |
| O | 0.28399700  | 0.20200800  | 2.21890600  |
| C | -1.87335500 | 0.49577000  | 0.53427900  |
| C | 1.28378200  | -1.03211600 | -0.94545400 |
| C | 3.45655300  | -0.18780100 | -0.13905100 |
| C | -1.44325400 | 2.92866900  | 0.39838500  |
| C | -0.42532200 | 3.61665300  | 1.08034000  |
| C | 4.01391500  | -0.48666800 | 1.12293000  |
| C | 3.23770900  | -2.17099800 | -1.74760000 |
| C | -3.04802700 | -1.64250400 | 0.85945100  |
| C | 3.65526000  | 1.08660300  | -0.72053100 |
| C | 0.76190100  | -2.01946600 | -1.98036600 |
| C | -2.58633500 | -2.53070000 | 1.83975700  |
| C | 0.01239500  | 3.24436700  | 2.48421700  |

|   |             |             |             |
|---|-------------|-------------|-------------|
| H | -0.41051000 | 2.25889500  | 2.71659000  |
| C | -1.91130700 | 3.33515600  | -0.86655100 |
| C | 4.81762900  | 0.47293000  | 1.74826700  |
| H | 5.25529400  | 0.24476500  | 2.72244200  |
| C | -0.26426500 | 5.11545100  | -0.82640200 |
| H | 0.20942200  | 5.96987500  | -1.31279400 |
| C | 4.45176700  | 2.01798100  | -0.04869700 |
| H | 4.60676200  | 3.00359300  | -0.49262800 |
| C | -3.17971100 | 1.82448300  | 1.82474500  |
| H | -3.50880700 | 2.75145100  | 2.28252700  |
| C | 5.04561800  | 1.71467800  | 1.17071200  |
| H | 5.67042100  | 2.45173800  | 1.67772000  |
| C | 0.15022400  | 4.71989400  | 0.44015100  |
| H | 0.94398400  | 5.27245900  | 0.94632700  |
| C | -3.59945800 | -2.08318500 | -0.36312800 |
| C | -2.74930000 | -3.90302700 | 1.60669700  |
| H | -2.40526900 | -4.61674100 | 2.35805500  |
| C | 2.05620000  | -2.47568000 | -2.68929900 |
| H | 2.02993000  | -3.54042200 | -2.96265800 |
| H | 2.18703600  | -1.90765700 | -3.62215100 |
| C | -3.68771300 | 0.57293700  | 1.89132200  |
| H | -4.53757600 | 0.17652900  | 2.43759300  |
| C | -1.28915700 | 4.42962900  | -1.47180000 |
| H | -1.62175700 | 4.75701200  | -2.45916000 |
| C | 3.00022300  | 1.51251600  | -2.02438300 |
| H | 2.53003500  | 0.62812500  | -2.47120300 |
| C | 3.67621300  | -3.43358800 | -0.99727000 |
| H | 4.50921400  | -3.22124700 | -0.31694900 |
| H | 4.01679300  | -4.18582700 | -1.72398200 |
| H | 2.84995000  | -3.86601300 | -0.41729500 |
| C | 0.05189900  | -3.17417700 | -1.22264500 |
| H | 0.76733000  | -3.61543800 | -0.51014800 |
| H | -0.74570700 | -2.71923800 | -0.61055300 |
| C | 3.72893000  | -1.77351200 | 1.87900400  |

|   |             |             |             |
|---|-------------|-------------|-------------|
| H | 3.05512000  | -2.38066800 | 1.25962400  |
| C | 4.44035600  | -1.61421900 | -2.50848200 |
| H | 4.16342700  | -0.72672400 | -3.09319600 |
| H | 4.81615600  | -2.37940300 | -3.20322900 |
| H | 5.25544600  | -1.34035400 | -1.82212600 |
| C | -3.07315500 | 2.64526200  | -1.56472900 |
| H | -3.48775500 | 1.88778400  | -0.88237800 |
| C | -1.88449600 | -2.05652100 | 3.09864400  |
| H | -1.77349800 | -0.96584800 | 3.03720900  |
| C | -3.32037400 | -4.36247300 | 0.42878800  |
| H | -3.43420700 | -5.43458800 | 0.25932300  |
| B | 0.37095600  | -0.18480900 | -0.07042400 |
| C | -3.72842500 | -3.45938100 | -0.55327000 |
| H | -4.14390500 | -3.84003000 | -1.48605600 |
| C | -0.54794700 | 4.25337800  | 3.49427700  |
| H | -0.15388600 | 5.26299000  | 3.29887500  |
| H | -0.26332400 | 3.96932600  | 4.51807200  |
| H | -1.64563400 | 4.30858300  | 3.44562800  |
| C | 1.89449700  | 2.54076000  | -1.75629000 |
| H | 2.31281300  | 3.44774800  | -1.29208500 |
| H | 1.12172500  | 2.14844200  | -1.07569600 |
| H | 1.40152600  | 2.83888400  | -2.69501000 |
| C | -0.23555900 | -1.41107400 | -2.99007400 |
| H | -0.42190100 | -2.16631700 | -3.77268600 |
| H | -1.18973500 | -1.24899700 | -2.46304900 |
| C | 4.01097800  | 2.07170000  | -3.03131100 |
| H | 3.52146800  | 2.24550700  | -4.00147700 |
| H | 4.85545600  | 1.38487000  | -3.18654200 |
| H | 4.42249000  | 3.03522300  | -2.69483100 |
| C | -0.55032200 | -4.27477200 | -2.09129800 |
| H | -0.93371100 | -5.08929200 | -1.45993900 |
| H | 0.18617900  | -4.70970200 | -2.78512900 |
| H | -1.39636500 | -3.90358000 | -2.68802700 |
| C | -2.60591500 | 1.91545600  | -2.82516400 |

|   |             |             |             |
|---|-------------|-------------|-------------|
| H | -3.45383600 | 1.40925700  | -3.31295800 |
| H | -1.84737500 | 1.16392200  | -2.56812900 |
| H | -2.16733600 | 2.61861400  | -3.55100100 |
| C | 1.53432000  | 3.12883900  | 2.60882700  |
| H | 1.94810500  | 2.45054100  | 1.84952800  |
| H | 1.79699800  | 2.72819800  | 3.59888700  |
| H | 2.02240500  | 4.11127900  | 2.50797800  |
| C | 3.01022600  | -1.48736700 | 3.20377500  |
| H | 2.73676100  | -2.43329700 | 3.69642600  |
| H | 2.10020300  | -0.89355500 | 3.05344500  |
| H | 3.66754800  | -0.93278800 | 3.89141400  |
| C | -4.01437200 | -1.08672400 | -1.43479600 |
| H | -3.20933600 | -0.33697300 | -1.48268000 |
| C | -2.69982100 | -2.39005000 | 4.35130300  |
| H | -2.83075400 | -3.47782300 | 4.46102000  |
| H | -3.70032000 | -1.93464500 | 4.31191400  |
| H | -2.18865700 | -2.01963100 | 5.25184900  |
| C | -0.47067400 | -2.63995600 | 3.17823100  |
| H | 0.07139400  | -2.20362500 | 4.02983600  |
| H | 0.09725500  | -2.41105000 | 2.26358700  |
| H | -0.49374800 | -3.73304300 | 3.31158800  |
| C | -4.20171500 | 3.63462700  | -1.87100700 |
| H | -3.88098000 | 4.39739800  | -2.59647400 |
| H | -4.53611400 | 4.15216300  | -0.96035200 |
| H | -5.06370400 | 3.10551800  | -2.30381600 |
| C | 5.01316200  | -2.56514900 | 2.15887800  |
| H | 5.63067500  | -2.04197100 | 2.90516000  |
| H | 5.63269000  | -2.69621400 | 1.26098500  |
| H | 4.77489000  | -3.55945800 | 2.56580200  |
| C | -5.32322500 | -0.37242100 | -1.07437700 |
| H | -6.15267100 | -1.09465500 | -1.02420800 |
| H | -5.56988400 | 0.37707000  | -1.84265400 |
| H | -5.26171100 | 0.14615100  | -0.10794700 |
| C | 0.19382000  | -0.10416900 | -3.64465900 |

|   |             |             |             |
|---|-------------|-------------|-------------|
| H | 0.29329800  | 0.69165000  | -2.89331900 |
| H | -0.55254700 | 0.22052900  | -4.38428300 |
| H | 1.15549600  | -0.19557300 | -4.17376200 |
| C | -4.13017300 | -1.70993000 | -2.82494900 |
| H | -3.21980300 | -2.26127700 | -3.10077800 |
| H | -4.28806900 | -0.92057600 | -3.57400700 |
| H | -4.98670900 | -2.39846000 | -2.89066200 |

**MECP**

|   |             |             |             |
|---|-------------|-------------|-------------|
| N | 2.68392200  | -1.03666200 | -0.83517500 |
| N | -0.91870400 | 0.12100800  | -0.24232400 |
| N | -2.18138600 | 1.72353600  | 1.02357300  |
| O | 0.15274100  | 0.08676900  | 2.33492400  |
| N | -2.80422500 | -0.36812600 | 1.12351500  |
| O | 0.95158900  | -0.24763300 | 1.36138100  |
| C | -1.85383700 | 0.46440900  | 0.58512500  |
| C | 1.31273100  | -1.04706300 | -0.95095500 |
| C | 3.37621000  | 0.05196200  | -0.20478000 |
| C | -1.61931700 | 2.92255500  | 0.47715400  |
| C | -0.58539300 | 3.59158300  | 1.15129900  |
| C | 3.98023500  | -0.10817900 | 1.06314800  |
| C | 3.35170300  | -2.02268300 | -1.73014900 |
| C | -2.87558600 | -1.77023100 | 0.83554100  |
| C | 3.41446700  | 1.31008300  | -0.85545300 |
| C | 0.87658300  | -2.09976300 | -1.95283900 |
| C | -2.39677400 | -2.68787800 | 1.78160900  |
| C | -0.02216500 | 3.10459800  | 2.47135500  |
| H | -0.51495600 | 2.15573900  | 2.71561700  |
| C | -2.14408400 | 3.38703700  | -0.74392600 |
| C | 4.66796000  | 0.97398000  | 1.62306800  |
| H | 5.14142800  | 0.85230600  | 2.59946100  |

|   |             |             |             |
|---|-------------|-------------|-------------|
| C | -0.56293500 | 5.22510600  | -0.64652800 |
| H | -0.14210900 | 6.12845900  | -1.09124200 |
| C | 4.10389700  | 2.36412300  | -0.24739800 |
| H | 4.13529400  | 3.33569900  | -0.74530700 |
| C | -3.28206300 | 1.65631200  | 1.87133100  |
| H | -3.69282900 | 2.54576600  | 2.33749700  |
| C | 4.74163400  | 2.20063100  | 0.97596400  |
| H | 5.27919700  | 3.03336600  | 1.43296900  |
| C | -0.07278400 | 4.75448100  | 0.56571800  |
| H | 0.73256800  | 5.29156700  | 1.07097600  |
| C | -3.40220600 | -2.17588900 | -0.41271300 |
| C | -2.50011600 | -4.05311300 | 1.48041600  |
| H | -2.14114400 | -4.78740200 | 2.20439900  |
| C | 2.20054800  | -2.40857700 | -2.68434000 |
| H | 2.27736200  | -3.45865800 | -3.00115700 |
| H | 2.26871600  | -1.78842100 | -3.59163400 |
| C | -3.66116700 | 0.36005000  | 1.94318500  |
| H | -4.46646700 | -0.11801200 | 2.49159400  |
| C | -1.58899600 | 4.54405100  | -1.29546000 |
| H | -1.96727900 | 4.91805900  | -2.24884800 |
| C | 2.70824500  | 1.59091900  | -2.17316200 |
| H | 2.33845300  | 0.63717600  | -2.57028900 |
| C | 3.86223400  | -3.24673900 | -0.95851200 |
| H | 4.67891600  | -2.97425500 | -0.27984300 |
| H | 4.24914900  | -3.99211900 | -1.66919000 |
| H | 3.06532700  | -3.71744600 | -0.36881400 |
| C | 0.31324200  | -3.30996800 | -1.15521700 |
| H | 1.06179500  | -3.63027100 | -0.41488700 |
| H | -0.54339600 | -2.93415100 | -0.56828200 |
| C | 3.89933600  | -1.39299600 | 1.87000400  |

|   |             |             |             |
|---|-------------|-------------|-------------|
| H | 3.25421100  | -2.08760700 | 1.31474100  |
| C | 4.52484200  | -1.39492300 | -2.47970600 |
| H | 4.19997400  | -0.52644200 | -3.06787600 |
| H | 4.95433500  | -2.13655500 | -3.16880200 |
| H | 5.31463700  | -1.07042100 | -1.78554400 |
| C | -3.26210500 | 2.66135300  | -1.47313500 |
| H | -3.63287800 | 1.85572200  | -0.82121900 |
| C | -1.75584800 | -2.25373800 | 3.08654700  |
| H | -1.67351700 | -1.15939400 | 3.07541200  |
| C | -3.03501500 | -4.47832600 | 0.27364200  |
| H | -3.10322900 | -5.54467200 | 0.05181300  |
| B | 0.36124900  | -0.33798700 | 0.01701700  |
| C | -3.47017300 | -3.54624300 | -0.66871000 |
| H | -3.86607200 | -3.90038600 | -1.62018400 |
| C | -0.32412700 | 4.10174700  | 3.59464100  |
| H | 0.15226500  | 5.07486000  | 3.39930400  |
| H | 0.06036600  | 3.72583900  | 4.55416300  |
| H | -1.40564400 | 4.27312300  | 3.69983400  |
| C | 1.49704800  | 2.50618800  | -1.94628500 |
| H | 1.81651300  | 3.46861400  | -1.51635500 |
| H | 0.76458100  | 2.05599300  | -1.25696900 |
| H | 0.98525800  | 2.71674000  | -2.89892200 |
| C | -0.23106700 | -1.62160200 | -2.91353600 |
| H | -0.39140000 | -2.40788500 | -3.67044200 |
| H | -1.15910000 | -1.55026700 | -2.32257500 |
| C | 3.64442300  | 2.20593000  | -3.21979100 |
| H | 3.13442300  | 2.26238100  | -4.19349000 |
| H | 4.56583400  | 1.61858200  | -3.34392500 |
| H | 3.93678700  | 3.23036000  | -2.94453800 |
| C | -0.13900100 | -4.51227400 | -1.97879300 |

|   |             |             |             |
|---|-------------|-------------|-------------|
| H | -0.45176900 | -5.33084300 | -1.31434200 |
| H | 0.66456300  | -4.90003500 | -2.62424000 |
| H | -0.99925800 | -4.26724800 | -2.61860800 |
| C | -2.72595600 | 2.00733500  | -2.74922900 |
| H | -3.52074000 | 1.43765800  | -3.25623700 |
| H | -1.90064000 | 1.32326500  | -2.50766700 |
| H | -2.35185100 | 2.76698200  | -3.45403300 |
| C | 1.48061800  | 2.82757500  | 2.36155500  |
| H | 1.70963100  | 2.14389200  | 1.53023200  |
| H | 1.85009400  | 2.36091700  | 3.28678700  |
| H | 2.04742800  | 3.75852800  | 2.19935800  |
| C | 3.26500800  | -1.16842800 | 3.24936900  |
| H | 3.16231800  | -2.13240900 | 3.77171100  |
| H | 2.27336800  | -0.70547200 | 3.17419700  |
| H | 3.90377200  | -0.52524600 | 3.87491600  |
| C | -3.87299900 | -1.15564100 | -1.44077500 |
| H | -3.10047800 | -0.37070800 | -1.47699100 |
| C | -2.61248200 | -2.66028400 | 4.28948400  |
| H | -2.72316800 | -3.75421700 | 4.34563500  |
| H | -3.62060400 | -2.22371600 | 4.23277200  |
| H | -2.14330600 | -2.32084900 | 5.22438800  |
| C | -0.33263800 | -2.80877400 | 3.20680200  |
| H | 0.16386200  | -2.38406900 | 4.09122200  |
| H | 0.27145500  | -2.54647300 | 2.32579000  |
| H | -0.33752100 | -3.90502300 | 3.31218900  |
| C | -4.44513500 | 3.58870500  | -1.76339600 |
| H | -4.16292100 | 4.39664600  | -2.45536400 |
| H | -4.82428700 | 4.05017100  | -0.84015800 |
| H | -5.26569700 | 3.02397300  | -2.23043200 |
| C | 5.29033100  | -2.01834500 | 2.05022700  |

|   |             |             |             |
|---|-------------|-------------|-------------|
| H | 5.89671900  | -1.40912600 | 2.73852100  |
| H | 5.84721400  | -2.08645300 | 1.10527600  |
| H | 5.21150800  | -3.02777100 | 2.48179900  |
| C | -5.20552200 | -0.50874100 | -1.03855900 |
| H | -6.00211300 | -1.26748100 | -0.99544100 |
| H | -5.49610900 | 0.24657300  | -1.78548900 |
| H | -5.15363200 | -0.00974700 | -0.06174300 |
| C | 0.00444700  | -0.28712800 | -3.60516100 |
| H | 0.09219200  | 0.51357100  | -2.85956000 |
| H | -0.83863700 | -0.04436300 | -4.26906000 |
| H | 0.91703100  | -0.28556100 | -4.22188900 |
| C | -3.99797600 | -1.73210800 | -2.85136400 |
| H | -3.07942500 | -2.24511200 | -3.16987500 |
| H | -4.19934000 | -0.92010900 | -3.56501100 |
| H | -4.83480600 | -2.44404200 | -2.92262200 |

### **1INT3**

|   |             |             |             |
|---|-------------|-------------|-------------|
| N | 2.54744400  | -1.12900800 | -0.93133000 |
| N | -0.82628500 | 0.26458400  | -0.37368000 |
| N | -2.00258500 | 1.88056500  | 0.95733800  |
| O | -0.08490900 | -0.15566300 | 2.37741500  |
| N | -2.76860400 | -0.15676800 | 0.96942600  |
| O | 0.68944800  | -0.73327000 | 1.32742400  |
| C | -1.75053200 | 0.62446600  | 0.48228800  |
| C | 1.25959300  | -1.25789300 | -0.91978400 |
| C | 3.28133500  | -0.12055100 | -0.17858200 |
| C | -1.31198600 | 3.05772400  | 0.53124300  |
| C | -0.26281700 | 3.56961400  | 1.31037900  |
| C | 3.79221000  | -0.40326100 | 1.10755200  |
| C | 3.26753100  | -2.08816100 | -1.85791300 |

|   |             |             |             |
|---|-------------|-------------|-------------|
| C | -2.96507600 | -1.53197200 | 0.62866600  |
| C | 3.45917100  | 1.13598100  | -0.79591800 |
| C | 0.79937300  | -2.38957200 | -1.79574000 |
| C | -2.70500100 | -2.52491700 | 1.58655200  |
| C | 0.21895300  | 2.87731900  | 2.56911400  |
| H | -0.38002900 | 1.97007800  | 2.71853400  |
| C | -1.73503000 | 3.67008600  | -0.66393200 |
| C | 4.58384800  | 0.58358900  | 1.70641200  |
| H | 4.99506900  | 0.39191900  | 2.69875100  |
| C | -0.04423300 | 5.37249200  | -0.30603800 |
| H | 0.45434600  | 6.28640500  | -0.63434100 |
| C | 4.24806100  | 2.08348200  | -0.13854500 |
| H | 4.39229700  | 3.06363600  | -0.59589700 |
| C | -3.08954400 | 1.85461500  | 1.82073100  |
| H | -3.42310800 | 2.74759400  | 2.33848000  |
| C | 4.82954300  | 1.80338400  | 1.09094900  |
| H | 5.44688900  | 2.55245000  | 1.58906300  |
| C | 0.35557900  | 4.74572000  | 0.86879500  |
| H | 1.17295700  | 5.16693900  | 1.45822100  |
| C | -3.43789200 | -1.83903100 | -0.67022200 |
| C | -2.94497200 | -3.85894500 | 1.22296300  |
| H | -2.75708900 | -4.64721100 | 1.95480600  |
| C | 2.09116400  | -2.84196200 | -2.51299900 |
| H | 2.23602700  | -3.92730300 | -2.42660300 |
| H | 2.04312800  | -2.60645600 | -3.58539000 |
| C | -3.55954800 | 0.58668800  | 1.83610900  |
| H | -4.39081800 | 0.14005700  | 2.37169100  |
| C | -1.07607600 | 4.83280500  | -1.07047600 |
| H | -1.37829400 | 5.32560400  | -1.99696500 |
| C | 2.76659600  | 1.54269500  | -2.08816400 |

|   |             |             |             |
|---|-------------|-------------|-------------|
| H | 2.33101400  | 0.64788100  | -2.54690000 |
| C | 4.17063900  | -3.00592600 | -1.04384800 |
| H | 4.96977600  | -2.42788700 | -0.56264100 |
| H | 4.63505400  | -3.73532700 | -1.72212000 |
| H | 3.60946700  | -3.55317100 | -0.27416600 |
| C | 0.23242800  | -3.46862000 | -0.83672900 |
| H | 1.02382500  | -3.75573000 | -0.12309500 |
| H | -0.57128400 | -3.01108400 | -0.23480600 |
| C | 3.50295100  | -1.65739700 | 1.92514400  |
| H | 2.80747100  | -2.28770700 | 1.35288700  |
| C | 4.11336800  | -1.33207900 | -2.87903600 |
| H | 3.49715300  | -0.72295600 | -3.55319900 |
| H | 4.65500600  | -2.06903000 | -3.48875800 |
| H | 4.85219600  | -0.68451000 | -2.38534400 |
| C | -2.84366600 | 3.07983800  | -1.51918900 |
| H | -3.32796500 | 2.27962100  | -0.94011000 |
| C | -2.18954400 | -2.21089600 | 2.97827100  |
| H | -1.92179500 | -1.14794400 | 3.00756200  |
| C | -3.40265700 | -4.18733200 | -0.04391200 |
| H | -3.57681500 | -5.23169200 | -0.30994100 |
| B | 0.27147300  | -0.46468200 | 0.07974000  |
| C | -3.63870000 | -3.18401000 | -0.98474400 |
| H | -3.99561400 | -3.45987500 | -1.97698400 |
| C | 0.09147800  | 3.78757800  | 3.79271200  |
| H | 0.73120500  | 4.68056900  | 3.70598600  |
| H | 0.39724500  | 3.24411200  | 4.69848500  |
| H | -0.94484100 | 4.13019500  | 3.93342200  |
| C | 1.60488300  | 2.49843300  | -1.78548000 |
| H | 1.97122300  | 3.41934800  | -1.30587500 |
| H | 0.86293400  | 2.03801000  | -1.11466400 |

|   |             |             |             |
|---|-------------|-------------|-------------|
| H | 1.09160600  | 2.78126900  | -2.71839400 |
| C | -0.29988400 | -1.90441400 | -2.75801400 |
| H | -0.50940000 | -2.71961800 | -3.46952400 |
| H | -1.20967400 | -1.74209900 | -2.16110800 |
| C | 3.72838400  | 2.16382100  | -3.10509100 |
| H | 3.20786700  | 2.33054300  | -4.05969300 |
| H | 4.60141500  | 1.52279400  | -3.29442300 |
| H | 4.09648500  | 3.14162000  | -2.76124700 |
| C | -0.30836500 | -4.70642500 | -1.54244800 |
| H | -0.63111900 | -5.44799100 | -0.79880900 |
| H | 0.44717200  | -5.18249100 | -2.18648700 |
| H | -1.18454700 | -4.46341000 | -2.15934000 |
| C | -2.25427600 | 2.43910000  | -2.78007400 |
| H | -3.04543000 | 1.95137600  | -3.37218500 |
| H | -1.50307400 | 1.68528900  | -2.50416400 |
| H | -1.77406000 | 3.20026300  | -3.41602000 |
| C | 1.65185200  | 2.37522900  | 2.38156500  |
| H | 1.70821300  | 1.67878600  | 1.53068800  |
| H | 1.97172900  | 1.81572700  | 3.27273500  |
| H | 2.35708300  | 3.20684000  | 2.21245800  |
| C | 2.80971100  | -1.30701400 | 3.25343100  |
| H | 2.56771500  | -2.24175600 | 3.78308400  |
| H | 1.87620700  | -0.74227100 | 3.11746600  |
| H | 3.49549300  | -0.73807400 | 3.90188200  |
| C | -3.74235600 | -0.73956800 | -1.68124600 |
| H | -2.88491200 | -0.04730400 | -1.66506800 |
| C | -3.25356300 | -2.52557800 | 4.03417600  |
| H | -3.50517800 | -3.59842300 | 4.04502700  |
| H | -4.18577200 | -1.96904600 | 3.85280900  |
| H | -2.88558200 | -2.25658200 | 5.03512500  |

|   |             |             |             |
|---|-------------|-------------|-------------|
| C | -0.87939100 | -2.95048400 | 3.25981100  |
| H | -0.48827800 | -2.64117600 | 4.23983100  |
| H | -0.12597000 | -2.67303900 | 2.50973100  |
| H | -1.01676000 | -4.04478900 | 3.27393100  |
| C | -3.92181200 | 4.10946800  | -1.86388900 |
| H | -3.52338300 | 4.91337200  | -2.50124000 |
| H | -4.33833500 | 4.57023000  | -0.95678400 |
| H | -4.74386800 | 3.62866900  | -2.41502100 |
| C | 4.78119200  | -2.44683400 | 2.24653500  |
| H | 5.43173400  | -1.86192900 | 2.91436000  |
| H | 5.37340900  | -2.71515600 | 1.36318200  |
| H | 4.52100100  | -3.37392300 | 2.77825600  |
| C | -5.00848400 | 0.04003100  | -1.29812000 |
| H | -5.88482600 | -0.62637400 | -1.31332700 |
| H | -5.18536800 | 0.85152300  | -2.02151500 |
| H | -4.93763500 | 0.49029400  | -0.29931200 |
| C | 0.03906800  | -0.62034000 | -3.50426200 |
| H | 0.14699200  | 0.21372600  | -2.79400800 |
| H | -0.76689300 | -0.35327900 | -4.20292300 |
| H | 0.96776800  | -0.71132900 | -4.09193100 |
| C | -3.88669300 | -1.25043400 | -3.11519200 |
| H | -3.02544300 | -1.85674900 | -3.43028900 |
| H | -3.97126000 | -0.39701700 | -3.80348600 |
| H | -4.79612500 | -1.85902400 | -3.23690700 |

**TS2**

|   |             |             |             |
|---|-------------|-------------|-------------|
| N | 2.41014600  | -1.47733900 | -0.85683600 |
| N | -0.90392400 | 0.20671300  | -0.48355500 |
| N | -1.66407200 | 2.06490600  | 0.88008000  |
| O | -0.13708700 | -0.46323300 | 2.07919500  |

|   |             |             |             |
|---|-------------|-------------|-------------|
| N | -2.90285800 | 0.28109000  | 0.79649200  |
| O | 0.93510300  | 0.08549700  | 1.21223900  |
| C | -1.72311500 | 0.80824200  | 0.34466100  |
| C | 1.12062500  | -1.35901100 | -0.84371000 |
| C | 3.31278800  | -0.55599000 | -0.18590300 |
| C | -0.71541400 | 3.06701300  | 0.50552000  |
| C | 0.36932700  | 3.34268800  | 1.35555100  |
| C | 3.78521300  | -0.84972200 | 1.11044400  |
| C | 2.94085100  | -2.61447900 | -1.70526600 |
| C | -3.34508100 | -1.04682500 | 0.50686000  |
| C | 3.65666500  | 0.62973000  | -0.86133200 |
| C | 0.45598500  | -2.49504200 | -1.57703700 |
| C | -3.27227700 | -2.02018000 | 1.51534800  |
| C | 0.54733100  | 2.62484900  | 2.68091400  |
| H | 0.01144500  | 1.66465600  | 2.62536900  |
| C | -0.94335000 | 3.76233800  | -0.69609800 |
| C | 4.70700500  | 0.04059100  | 1.66810800  |
| H | 5.09234600  | -0.16114600 | 2.66905700  |
| C | 1.04891900  | 5.06100700  | -0.22593400 |
| H | 1.74826500  | 5.84826800  | -0.51419200 |
| C | 4.56738500  | 1.49301100  | -0.24271500 |
| H | 4.84524400  | 2.42136200  | -0.74465300 |
| C | -2.77147600 | 2.29322500  | 1.68594500  |
| H | -2.91718100 | 3.23982100  | 2.19468300  |
| C | 5.10810400  | 1.19189900  | 0.99999900  |
| H | 5.82118700  | 1.87323100  | 1.46645200  |
| C | 1.24741400  | 4.35788700  | 0.95863900  |
| H | 2.10115100  | 4.59925100  | 1.59377300  |
| C | -3.84025900 | -1.32223600 | -0.78645900 |
| C | -3.75700300 | -3.30039600 | 1.21173400  |

|   |             |             |             |
|---|-------------|-------------|-------------|
| H | -3.72533100 | -4.07601900 | 1.97941300  |
| C | 1.63813800  | -3.26098600 | -2.21802200 |
| H | 1.60873200  | -4.32592800 | -1.95000700 |
| H | 1.59326500  | -3.20322600 | -3.31456700 |
| C | -3.53607000 | 1.17910500  | 1.64359800  |
| H | -4.47871400 | 0.94046900  | 2.12459600  |
| C | -0.03334400 | 4.76290500  | -1.04910500 |
| H | -0.17635600 | 5.31768400  | -1.97875200 |
| C | 3.02714300  | 1.05469900  | -2.17915600 |
| H | 2.45001000  | 0.21316800  | -2.57894200 |
| C | 3.78038500  | -3.57066000 | -0.86709400 |
| H | 4.65616700  | -3.05661000 | -0.45000400 |
| H | 4.13626900  | -4.37996200 | -1.51990500 |
| H | 3.20149100  | -4.01895400 | -0.04934200 |
| C | -0.26273200 | -3.32494200 | -0.48127800 |
| H | 0.48801500  | -3.65181600 | 0.25964500  |
| H | -0.95591200 | -2.65556200 | 0.05509200  |
| C | 3.31889600  | -2.02253200 | 1.96296000  |
| H | 2.59591600  | -2.60770300 | 1.37728400  |
| C | 3.80420100  | -2.06432800 | -2.83915600 |
| H | 3.22490400  | -1.43683800 | -3.52917300 |
| H | 4.20687900  | -2.91307400 | -3.40954700 |
| H | 4.64937900  | -1.48034000 | -2.44714000 |
| C | -2.12127500 | 3.43894900  | -1.60280800 |
| H | -2.80258000 | 2.77250100  | -1.05200000 |
| C | -2.71197400 | -1.72832800 | 2.89735900  |
| H | -2.20730900 | -0.75347700 | 2.86042000  |
| C | -4.26245900 | -3.59661000 | -0.04641000 |
| H | -4.62843600 | -4.60168900 | -0.26441400 |
| B | 0.30789100  | -0.24744400 | 0.04576100  |

|   |             |             |             |
|---|-------------|-------------|-------------|
| C | -4.29169900 | -2.61856200 | -1.04084900 |
| H | -4.67757100 | -2.87346000 | -2.02794500 |
| C | -0.04746600 | 3.47026100  | 3.81497800  |
| H | 0.47114200  | 4.43908000  | 3.89892100  |
| H | 0.05538600  | 2.94236500  | 4.77456000  |
| H | -1.11629100 | 3.67597100  | 3.65721800  |
| C | 2.03881100  | 2.20156400  | -1.94264400 |
| H | 2.55883200  | 3.09059000  | -1.55627500 |
| H | 1.26176100  | 1.92895900  | -1.21101600 |
| H | 1.54018200  | 2.48039800  | -2.88417300 |
| C | -0.55915900 | -1.98717100 | -2.61785800 |
| H | -0.86538400 | -2.85094300 | -3.23061100 |
| H | -1.44323100 | -1.62596800 | -2.07429600 |
| C | 4.06721800  | 1.44587900  | -3.23245500 |
| H | 3.57073000  | 1.65656500  | -4.19115500 |
| H | 4.80903400  | 0.65106700  | -3.39536500 |
| H | 4.60909300  | 2.35682800  | -2.93827800 |
| C | -1.02257800 | -4.53277700 | -1.01669900 |
| H | -1.45533200 | -5.10100500 | -0.18166900 |
| H | -0.37249000 | -5.21438100 | -1.58742100 |
| H | -1.85504700 | -4.22455700 | -1.66387800 |
| C | -1.65305100 | 2.67986300  | -2.84871100 |
| H | -2.51487700 | 2.39889600  | -3.47507900 |
| H | -1.11806800 | 1.76490800  | -2.55696300 |
| H | -0.98067800 | 3.30645700  | -3.45681100 |
| C | 2.01073800  | 2.29198700  | 2.97129600  |
| H | 2.45084500  | 1.73985700  | 2.13060900  |
| H | 2.06514800  | 1.64459800  | 3.85914600  |
| H | 2.61201300  | 3.19274300  | 3.17963500  |
| C | 2.58839300  | -1.55030400 | 3.22965100  |

|   |             |             |             |
|---|-------------|-------------|-------------|
| H | 2.36204300  | -2.42842800 | 3.85516000  |
| H | 1.64273900  | -1.03945000 | 2.99581300  |
| H | 3.23795200  | -0.88557100 | 3.82109200  |
| C | -3.89076300 | -0.23479400 | -1.85203900 |
| H | -2.92342100 | 0.29066800  | -1.80912600 |
| C | -3.84228600 | -1.68312400 | 3.93221200  |
| H | -4.34380100 | -2.66095900 | 4.01143800  |
| H | -4.60906400 | -0.93864100 | 3.67077900  |
| H | -3.44177900 | -1.42692400 | 4.92394900  |
| C | -1.63830000 | -2.74318700 | 3.29932700  |
| H | -1.22950000 | -2.47232600 | 4.28381800  |
| H | -0.80808200 | -2.70185700 | 2.58246700  |
| H | -2.04090000 | -3.76655000 | 3.37066100  |
| C | -2.91859400 | 4.69030300  | -1.97821700 |
| H | -2.32344000 | 5.37682700  | -2.59908100 |
| H | -3.24586100 | 5.23881500  | -1.08342700 |
| H | -3.81107300 | 4.41136000  | -2.55789500 |
| C | 4.49071400  | -2.92769000 | 2.37193100  |
| H | 5.13616500  | -2.40905000 | 3.09703800  |
| H | 5.12336200  | -3.23664500 | 1.52958500  |
| H | 4.11028900  | -3.83291400 | 2.86765000  |
| C | -5.00894500 | 0.77751000  | -1.56763300 |
| H | -5.99252900 | 0.28470300  | -1.61344400 |
| H | -4.99471700 | 1.58061100  | -2.32102500 |
| H | -4.90548100 | 1.24297700  | -0.57804300 |
| C | -0.02784600 | -0.87044100 | -3.50729200 |
| H | 0.20561200  | 0.01885300  | -2.90215300 |
| H | -0.77952200 | -0.57112700 | -4.25196100 |
| H | 0.87902700  | -1.17124900 | -4.05844200 |
| C | -4.04230800 | -0.78216300 | -3.27090100 |

|   |             |             |             |
|---|-------------|-------------|-------------|
| H | -3.28437300 | -1.54596500 | -3.49848100 |
| H | -3.93017700 | 0.03630100  | -3.99686300 |
| H | -5.03670200 | -1.22713300 | -3.43089300 |

## VIII. References

- [1] Frisch, M. J.; Trucks, G. W.; Schlegel, H. B.; Scuseria, G. E.; Robb, M. A.; Cheeseman, J. R.; Scalmani, G.; Barone, V.; Petersson, G. A.; Nakatsuji, H.; Li, X.; Caricato, M.; Marenich, A. V.; Bloino, J.; Janesko, B. G.; Gomperts, R.; Mennucci, B.; Hratchian, H. P.; Ortiz, J. V.; Izmaylov, A. F.; Sonnenberg, J. L.; Williams-Young, D.; Ding, F.; Lipparini, F.; Egidi, F.; Goings, J.; Peng, B.; Petrone, A.; Henderson, T.; Ranasinghe, D.; Zakrzewski, V. G.; Gao, J.; Rega, N.; Zheng, G.; Liang, W.; Hada, M.; Ehara, M.; Toyota, K.; Fukuda, R.; Hasegawa, J.; Ishida, M.; Nakajima, T.; Honda, Y.; Kitao, O.; Nakai, H.; Vreven, T.; Throssell, K.; Montgomery, J. A., Jr.; Peralta, J. E.; Ogliaro, F.; Bearpark, M. J.; Heyd, J. J.; Brothers, E. N.; Kudin, K. N.; Staroverov, V. N.; Keith, T. A.; Kobayashi, R.; Normand, J.; Raghavachari, K.; Rendell, A. P.; Burant, J. C.; Iyengar, S. S.; Tomasi, J.; Cossi, M.; Millam, J. M.; Klene, M.; Adamo, C.; Cammi, R.; Ochterski, J. W.; Martin, R. L.; Morokuma, K.; Farkas, O.; Foresman, J. B.; Fox, D. J. *Gaussian 16 Rev. C.01*, Wallingford CT, **2016**.
- [2] Glendening, E. D.; Badenhoop, J. K.; Reed, A. E.; Carpenter, J. E.; Bohmann, J. A.; Morales, C. M.; Karafiloglou, P.; Landis, C. R.; Weinhold, F. NBO 7.0, University of Wisconsin: Madison, WI, **2018**.
- [3] Knizia, G. Intrinsic Atomic Orbitals: An Unbiased Bridge between Quantum Theory and Chemical Concepts. *J. Chem. Theory Comput.* **2013**, *9*, 4834–4843.
- [4] Knizia, G.; Klein, J. E. M. N. Electron Flow in Reaction Mechanisms-Revealed from First Principles. *Angew. Chem., Int. Ed.* **2015**, *54*, 5518–5522.
- [5] Neese, F. The ORCA program system. *Comput. Mol. Sci.* **2012**, *2*, 73–78.
- [6] Harvey, J. N. Understanding the kinetics of spin-forbidden chemical reactions. *Phys. Chem. Chem. Phys.* **2007**, *9*, 331–343.
- [7] Lu, T. sobMECP program, <http://sobereva.com/286> (accessed 1, 23, 2026).
- [8] Lu, T.; Chen, F. W. Multiwfn: A Multifunctional Wavefunction Analyzer. *J. Comput. Chem.* **2012**, *33*, 580–592.
- [9] Lu, T. A Comprehensive Electron Wavefunction Analysis Toolbox for Chemists, Multiwfn. *J. Chem. Phys.* **2024**, *161*, 082503.
- [10] Lu, T.; Chen, F. W. Meaning and Functional Form of the Electron Localization Function. *Acta. Phys. Chim. Sin.* **2011**, *27*, 2786–2792.
