# Supplementary material
Source: Research Square preprint supplement (doi:10.21203/rs.3.rs-9677735/v1)
Supplement: Supplementary file 2 [file e9bff3fff974522cb97a719e.docx]

**Scheme 1**. The synthesis of dioxaborirane **3**.

**Scheme 2**. Reactivity of **3**.
